# Supplementary material for: Towards More Structure: Comparing TNM Staging Completeness and Processing Time of Text-Based Reports versus Fully Segmented and Annotated PET/CT Data of Non-Small-Cell Lung Cancer
Source: Contrast Media Mol Imaging. 2018 Nov 1;2018:5693058. doi: 10.1155/2018/5693058 (PMC6236664; doi:10.1155/2018/5693058)
Supplement: Supplementary Materials — Table S1: detailed description of the T-label sets. Table S2: detailed description of the N-label sets. Table S3: detailed description of the M-label sets. Table S4: list with anonymized RIS time entries. Modelling for reporting time estimation (text and R code). [file 5693058.f1.zip]

Archive with 4 entries (4 files):
- 5693058.f1/modelling for reporting time estimation.docx
- 5693058.f1/Modelling for reporting time estimation.R
- 5693058.f1/TableS1-3.docx
- 5693058.f1/TableS4.xlsx
