# Supplementary material for: Towards More Structure: Comparing TNM Staging Completeness and Processing Time of Text-Based Reports versus Fully Segmented and Annotated PET/CT Data of Non-Small-Cell Lung Cancer
Source: Contrast Media Mol Imaging. 2018 Nov 1;2018:5693058. doi: 10.1155/2018/5693058 (PMC6236664; doi:10.1155/2018/5693058)
Supplement: Supplementary Materials — Table S1: detailed description of the T-label sets. Table S2: detailed description of the N-label sets. Table S3: detailed description of the M-label sets. Table S4: list with anonymized RIS time entries. Modelling for reporting time estimation (text and R code). [file 5693058.f1.zip › 5693058.f1/TableS4.xlsx]

## Sheet: RIS time
ID	first saving	start speech recognition	saving for second reading
25714198	2017-12-29 15:53:10	2017-12-29 15:16:41	2017-12-29 15:53:32
25701648	2017-12-29 15:05:13	2017-12-29 14:43:52	2017-12-29 15:05:13
25713556	2017-12-29 14:37:29	2017-12-29 14:07:09	2017-12-29 14:37:29
25700511	2017-12-29 14:06:55	2017-12-29 13:58:11	2017-12-29 16:21:39
25703192	2017-12-29 12:55:30	2017-12-29 13:27:09	2017-12-29 14:05:08
25712848	2017-12-29 12:47:38	2017-12-29 12:24:51	2017-12-29 12:47:38
25696991	2017-12-29 11:34:55		2017-12-29 11:34:55
25699541	2017-12-29 12:13:02		2017-12-29 12:13:02
25651193	2017-12-29 11:14:51		2017-12-29 11:36:40
25698819	2017-12-29 10:10:19		2017-12-29 10:37:10
25712539	2017-12-28 16:55:15		2017-12-29 08:46:12
25700889	2017-12-28 15:40:33		2017-12-28 15:40:33
25700680	2017-12-28 10:32:12	2017-12-28 10:26:25	2017-12-28 14:22:54
25700853	2017-12-28 12:20:49		2017-12-28 12:20:49
25686701	2017-12-27 17:27:35	2017-12-28 09:53:22	2017-12-28 11:40:37
25702094	2017-12-27 17:58:24	2017-12-27 17:30:02	2017-12-28 11:55:54
25701190	2017-12-27 16:04:13		2017-12-27 16:05:43
25699642	2017-12-27 18:03:20	2017-12-28 09:40:12	2017-12-28 10:26:50
25689306	2017-12-27 12:10:20	2017-12-27 12:03:14	2017-12-27 13:22:46
25689121	2017-12-27 12:49:39	2017-12-27 12:33:58	2017-12-28 14:05:53
25571463	2017-12-27 11:36:13		2017-12-27 17:07:50
25469854	2017-12-27 11:10:29		2017-12-27 11:10:29
25700085	2017-12-22 16:25:02	2017-12-22 15:30:59	2017-12-27 13:40:09
25699656	2017-12-22 15:00:19		2017-12-22 15:00:19
25697729	2017-12-22 14:42:01		2017-12-22 14:45:37
25694570	2017-12-22 14:09:02		2017-12-22 14:09:02
25694987	2017-12-22 14:11:08	2017-12-22 13:50:24	2017-12-27 10:13:58
25696284	2017-12-22 13:43:19	2017-12-22 13:18:19	2017-12-27 13:29:14
25696326	2017-12-22 12:12:02		2017-12-22 15:22:47
25633179	2017-12-22 12:54:48	2017-12-22 12:38:44	2017-12-27 10:42:22
25686901	2017-12-22 11:36:25	2017-12-22 11:26:24	2017-12-27 13:27:34
25690161	2017-12-22 11:09:56	2017-12-22 10:38:31	2017-12-27 13:32:23
25694361	2017-12-22 10:28:53	2017-12-22 09:55:41	2017-12-27 08:47:50
25690298	2017-12-21 13:28:56	2017-12-21 13:19:14	2017-12-27 08:40:02
25693512	2017-12-21 13:06:41	2017-12-21 12:53:35	2017-12-27 08:28:21
25696447	2017-12-20 18:12:18		2017-12-21 18:07:26
25694869	2017-12-21 09:43:49		2017-12-21 11:31:05
25694974	2017-12-20 15:45:23	2017-12-20 15:31:53	2017-12-21 10:16:24
25696332	2017-12-20 16:52:05	2017-12-20 16:28:46	2017-12-21 10:32:46
25689527	2017-12-20 15:22:32	2017-12-20 14:56:57	2017-12-21 11:28:01
25695966	2017-12-20 14:24:08	2017-12-20 14:06:56	2017-12-21 09:52:31
25694971	2017-12-20 14:53:53		2017-12-20 17:38:38
25639745	2017-12-20 13:54:22	2017-12-20 13:23:58	2017-12-21 09:20:04
25493031	2017-12-20 13:09:34	2017-12-20 11:38:03	2017-12-21 09:05:04
25697957	2017-12-20 10:28:07	2017-12-20 10:01:28	2017-12-21 08:58:30
25696336	2017-12-19 16:54:20	2017-12-21 13:38:32	2017-12-20 08:09:06
25697435	2017-12-19 15:09:25		2017-12-20 08:22:51
25693774	2017-12-20 08:49:54		2017-12-21 10:05:50
25696100	2017-12-19 11:16:54		2017-12-20 08:05:24
25693954	2017-12-19 14:24:41		2017-12-19 14:57:01
25690646	2017-12-19 17:01:50
25654853	2017-12-18 17:35:48		2017-12-21 15:04:29
25690725	2017-12-18 17:34:24		2017-12-19 08:50:27
25695915	2017-12-18 16:21:47		2017-12-19 09:24:13
25688588	2017-12-20 09:36:05		2017-12-20 09:36:05
25634187	2017-12-18 14:14:39	2017-12-18 14:08:59	2017-12-19 11:11:35
25696699	2017-12-18 16:15:43		2017-12-19 17:04:54
25695264	2017-12-18 13:54:28	2017-12-18 13:42:38	2017-12-19 16:44:20
25486725	2017-12-18 15:18:20		2017-12-19 09:59:07
25695914	2017-12-18 11:00:04		2017-12-19 09:49:12
25688646	2017-12-18 10:22:04		2017-12-19 08:56:53
25700347	2017-12-21 20:10:05		2017-12-21 20:10:05
25694479	2017-12-15 15:23:13	2017-12-15 14:51:39	2017-12-18 14:10:29
25663857	2017-12-15 13:46:47	2017-12-15 13:47:11	2017-12-15 15:09:26
25559686	2017-12-15 14:11:31	2017-12-15 13:43:43	2017-12-18 09:34:26
25557011	2017-12-15 14:15:40	2017-12-15 13:47:34	2017-12-18 12:34:32
25633233	2017-12-15 12:14:27	2017-12-15 11:46:21	2017-12-18 09:02:56
25544730	2017-12-15 11:53:55	2017-12-15 11:28:01	2017-12-18 12:01:57
25694680	2017-12-15 11:18:09	2017-12-15 11:04:50	2017-12-18 12:36:17
25694674	2017-12-15 10:39:47	2017-12-15 10:57:22	2017-12-18 11:39:24
25692721	2017-12-14 17:48:59	2017-12-14 17:41:39	2017-12-15 17:44:44
25693114	2017-12-14 16:46:45	2017-12-14 16:26:32	2017-12-15 15:26:37
25692352	2017-12-14 14:24:55	2017-12-14 13:56:54	2017-12-14 16:55:39
25687364	2017-12-14 14:39:25	2017-12-14 14:27:52	2017-12-15 10:20:12
25694110	2017-12-14 13:41:56	2017-12-14 13:18:20	2017-12-14 17:25:05
25689356	2017-12-14 13:17:28	2017-12-14 12:53:00	2017-12-14 17:30:19
25687426	2017-12-14 11:48:28	2017-12-14 11:29:11	2017-12-15 09:04:44
25692708	2017-12-13 16:21:40	2017-12-13 17:15:50	2017-12-14 18:16:37
25587624	2017-12-13 16:06:55	2017-12-13 15:24:56	2017-12-14 17:47:04
25564520	2017-12-13 15:12:12	2017-12-13 14:38:50	2017-12-14 16:43:44
25686822	2017-12-13 14:10:29	2017-12-13 14:03:31	2017-12-14 11:01:37
25659760	2017-12-13 13:53:59	2017-12-13 13:34:53	2017-12-14 15:03:44
25632813	2017-12-13 13:33:10	2017-12-13 13:05:25	2017-12-14 15:06:45
25581910	2017-12-13 11:05:39	2017-12-14 10:09:07	2017-12-13 11:05:39
25549447	2017-12-13 11:07:32	2017-12-13 10:44:54	2017-12-14 16:26:58
25486070	2017-12-13 10:36:08	2017-12-13 10:17:30	2017-12-14 16:16:37
25690838	2017-12-12 16:45:35	2017-12-12 16:32:49	2017-12-15 10:13:53
25688589	2017-12-12 16:15:03		2017-12-20 12:58:47
25690683	2017-12-12 17:44:15	2017-12-14 17:57:51	2017-12-13 18:50:51
25686954	2017-12-12 15:52:22	2017-12-14 07:42:16	2017-12-13 18:51:30
25575979	2017-12-12 11:20:57	2017-12-18 13:18:13	2017-12-18 11:23:10
25688634	2017-12-12 11:19:25		2017-12-13 08:03:10
25689138	2017-12-11 18:38:46	2017-12-11 18:14:23	2017-12-13 16:22:45
25687394	2017-12-12 08:57:44		2017-12-12 08:57:44
25686808	2017-12-12 08:42:29		2017-12-12 11:08:32
25652213	2017-12-11 15:06:50	2017-12-12 08:53:22	2017-12-11 15:06:50
25635363	2017-12-11 14:59:54		2017-12-12 10:01:53
25633937	2017-12-11 13:00:18	2017-12-12 10:36:44	2017-12-11 13:00:18
25633201	2017-12-11 14:32:36	2017-12-11 13:58:30	2017-12-12 10:19:49
25592446	2017-12-11 14:23:00	2017-12-12 16:51:03	2017-12-12 10:04:54
25592796	2017-12-11 12:40:11		2017-12-11 12:40:11
25487219	2017-12-11 13:46:16		2017-12-12 13:34:03
25689395	2017-12-11 10:07:54		2017-12-18 15:37:45
25688041	2017-12-08 16:35:46		2017-12-14 10:57:00
25632078	2017-12-08 15:03:34	2017-12-08 18:42:36	2017-12-11 17:11:45
25688019	2017-12-08 14:14:12		2017-12-08 17:59:27
25470187	2017-12-08 14:14:07	2017-12-08 16:29:34	2017-12-08 14:36:05
25688044	2017-12-08 13:49:32		2017-12-08 17:58:47
25687357	2017-12-11 08:54:33		2017-12-11 08:54:33
25688029	2017-12-08 15:40:56		2017-12-14 10:56:36
25655650	2017-12-08 11:38:20	2017-12-08 11:23:28	2017-12-08 15:37:45
25688039	2017-12-08 13:38:26		2017-12-08 17:59:08
25687371	2017-12-08 10:15:30		2017-12-08 17:59:56
25698231	2017-12-19 20:10:04		2017-12-19 20:10:04
25674962	2017-12-07 16:22:03		2017-12-13 18:52:53
25660796	2017-12-07 16:30:44	2017-12-07 15:52:22	2017-12-08 15:47:19
25634151	2017-12-07 15:43:11	2017-12-07 15:23:26	2017-12-08 15:33:51
25633956	2017-12-07 15:36:58		2017-12-08 10:13:29
25635030	2017-12-07 14:31:26	2017-12-08 16:17:22	2017-12-07 14:31:26
25633327	2017-12-07 12:27:54		2017-12-11 15:53:28
25580101	2017-12-07 15:58:34		2017-12-08 10:12:28
25592081	2017-12-07 13:54:42	2017-12-07 12:01:33	2017-12-07 17:08:25
25633214	2017-12-07 14:35:39		2017-12-07 18:30:39
25696161	2017-12-15 20:09:59		2017-12-15 20:09:59
25632442	2017-12-06 17:42:39		2017-12-06 18:11:23
25634092	2017-12-07 09:33:43		2017-12-07 09:33:43
25584341	2017-12-06 16:06:17		2017-12-07 09:51:19
25638895	2017-12-06 14:49:11		2017-12-07 09:51:55
25585042	2017-12-06 13:52:21		2017-12-07 09:50:42
25571867	2017-12-06 13:07:34		2017-12-07 10:49:45
25515447	2017-12-06 11:18:49		2017-12-07 09:25:15
25633883	2017-12-06 10:17:18		2017-12-07 09:41:55
25637155	2017-12-06 09:46:49		2017-12-07 16:48:54
25687734	2017-12-07 17:32:13	2017-12-07 16:55:41	2017-12-07 17:32:13
25693737	2017-12-13 20:09:54		2017-12-13 20:09:54
25592916	2017-12-05 15:33:23		2017-12-05 16:25:18
25591994	2017-12-05 14:46:44		2017-12-05 16:29:40
25489151	2017-12-05 10:36:00		2017-12-05 13:45:32
25632470	2017-12-05 10:07:09		2017-12-05 10:43:39
25633155	2017-12-04 15:53:28	2017-12-04 16:25:14	2017-12-05 10:29:08
25613937	2017-12-04 18:27:55		2017-12-05 08:41:50
25606284	2017-12-04 15:18:18	2017-12-04 15:36:12	2017-12-05 10:31:16
25590397	2017-12-04 15:31:51	2017-12-04 15:24:11	2017-12-08 08:08:21
25592884	2017-12-04 13:29:23	2017-12-04 13:35:53	2017-12-05 10:37:11
25592555	2017-12-04 13:07:31	2017-12-04 13:19:34	2017-12-05 11:06:36
25633159	2017-12-04 12:03:10	2017-12-04 12:47:22	2017-12-05 11:08:54
25592120	2017-12-04 19:01:22	2017-12-05 14:13:41	2017-12-05 08:41:03
25632404	2017-12-04 12:02:37	2017-12-04 11:45:30	2017-12-05 11:12:14
25589864	2017-12-04 11:30:44	2017-12-04 11:15:47	2017-12-05 11:15:15
25575950	2017-12-04 10:59:34	2017-12-04 10:16:23	2017-12-05 11:19:55
25581981	2017-12-04 10:11:37	2017-12-04 09:42:52	2017-12-05 11:27:09
25590214	2017-12-04 10:07:29	2017-12-05 17:11:38	2017-12-04 10:51:17
25592756	2017-12-01 17:11:03		2017-12-04 08:42:11
25586618	2017-12-01 17:18:05		2017-12-04 08:51:28
25631335	2017-12-01 17:17:13		2017-12-04 10:49:33
25581039	2017-12-01 13:58:08		2017-12-01 14:16:50
25575980	2017-12-04 09:01:26		2017-12-04 09:01:26
25578803	2017-12-01 16:09:11	2017-12-01 15:30:13	2017-12-01 16:09:11
25574649	2017-12-04 09:33:31		2017-12-04 10:06:04
25631324	2017-12-01 14:00:13		2017-12-01 16:23:28
25632398	2017-12-01 14:51:57	2017-12-01 13:42:33	2017-12-01 15:18:27
25592174	2017-12-01 11:35:21		2017-12-01 15:34:56
25625537	2017-12-01 10:20:34		2017-12-01 15:31:00
25720054	2018-01-08 20:10:32		2018-01-08 20:10:32
25672651	2017-12-05 20:09:36		2017-12-05 20:09:36
25584746	2017-11-29 17:36:32	2017-11-30 08:58:10	2017-11-30 09:25:34
25583176	2017-11-29 14:43:32	2017-11-29 15:17:10	2017-11-29 17:46:30
25550475	2017-11-29 15:35:56		2017-11-29 17:26:51
25472081	2017-11-29 15:39:44		2017-11-30 17:08:36
25576606	2017-11-29 14:34:10		2017-12-01 08:40:31
25548157	2017-11-29 13:54:39		2017-11-30 17:05:23
25576422	2017-11-29 12:01:43		2017-11-29 13:51:29
25589955	2017-11-29 12:03:28		2017-12-01 08:39:46
25582384	2017-11-29 11:09:13		2017-12-01 08:40:10
25591601	2017-11-28 16:10:22		2017-12-05 10:30:12
25590511	2017-11-28 15:52:04		2017-11-29 09:59:17
25589679	2017-11-28 15:13:19		2017-12-04 14:58:18
25591892	2017-11-28 17:02:22		2017-11-29 15:40:20
25559672	2017-11-29 08:36:24		2017-12-05 10:14:23
25589882	2017-11-28 11:50:12		2017-11-29 10:38:49
25695594	2017-12-15 20:09:59		2017-12-15 20:09:59
25589178	2017-11-27 16:51:53		2017-11-28 11:33:09
25586595	2017-11-27 15:56:37		2017-11-28 11:33:37
25585985	2017-11-27 16:17:36		2017-11-27 17:50:00
25584088	2017-11-27 16:00:55		2017-11-28 14:06:45
25583305	2017-11-27 15:28:46		2017-11-28 10:09:28
25590103	2017-11-27 13:39:53		2017-11-30 07:52:49
25579046	2017-11-27 12:59:13	2017-11-27 12:31:29	2017-11-27 17:55:02
25579466	2017-11-27 12:10:16		2017-11-28 10:07:08
25590091	2017-11-27 11:31:32		2017-11-28 18:09:55
25551253	2017-11-27 10:42:46		2017-11-28 11:38:35
25589743	2017-11-27 10:09:25		2017-11-28 10:08:43
25699795	2017-12-20 20:10:04		2017-12-20 20:10:04
25584536	2017-11-24 15:49:04		2017-11-30 10:39:03
25578334	2017-11-24 16:18:06		2017-11-24 16:18:06
25573133	2017-11-24 16:11:27	2017-11-24 15:42:46	2017-11-24 16:11:27
25577598	2017-11-24 15:15:35		2017-11-24 15:15:35
25578795	2017-11-24 14:15:43		2017-11-24 14:15:43
25584068	2017-11-24 11:34:27		2017-11-24 11:34:27
25581967	2017-11-24 14:21:44	2017-11-24 14:19:46	2017-11-24 17:37:35
25589474	2017-11-24 14:08:12	2017-11-24 13:18:45	2017-11-24 17:32:34
25584701	2017-11-24 11:06:57		2017-11-24 11:06:57
25691015	2017-12-11 20:09:48		2017-12-11 20:09:48
25586599	2017-11-23 14:50:37	2017-11-23 14:34:56	2017-11-23 17:43:26
25585531	2017-11-23 14:29:18	2017-11-23 14:01:14	2017-11-23 16:56:43
25584893	2017-11-23 13:58:48	2017-11-23 13:33:54	2017-11-23 17:04:31
25575972	2017-11-23 13:06:06	2017-11-23 13:47:58	2017-11-23 15:30:12
25687721	2017-12-07 20:09:42		2017-12-07 20:09:42
25585174	2017-11-22 18:35:10		2017-11-22 18:35:10
25582973	2017-11-23 08:57:29		2017-11-23 08:57:29
25582034	2017-11-22 16:25:00	2017-11-23 11:24:45	2017-11-23 11:29:37
25586730	2017-11-22 15:25:05	2017-11-22 14:39:31	2017-11-22 18:17:55
25577467	2017-11-22 16:16:18	2017-11-23 07:30:47	2017-11-22 18:02:53
25573918	2017-11-22 16:17:30		2017-11-22 16:17:30
25469638	2017-11-22 15:21:13		2017-11-22 17:33:12
25461166	2017-11-22 12:55:09	2017-11-22 15:21:03	2017-11-23 11:25:45
25584945	2017-11-22 13:15:06		2017-11-22 17:53:54
25582186	2017-11-22 13:12:43		2017-11-22 13:12:43
25584350	2017-11-22 11:47:53		2017-11-22 17:49:45
25583204	2017-11-22 11:37:05		2017-11-27 15:44:55
25348712	2017-11-22 10:29:04		2017-11-22 17:36:25
25576114	2017-11-22 09:55:05		2017-11-22 09:55:05
25584327	2017-11-21 16:29:39		2017-11-21 16:42:41
25582163	2017-11-21 15:04:09		2017-11-24 10:12:15
25580308	2017-11-21 11:42:05		2017-11-21 16:48:13
25585953	2017-11-21 20:09:10		2017-11-21 20:09:10
25581725	2017-11-17 19:19:17	2017-11-17 19:15:23	2017-11-20 10:08:31
25580364	2017-11-17 19:36:09	2017-11-17 19:23:59	2017-11-20 08:30:52
25582357	2017-11-17 16:38:00	2017-11-17 16:33:00	2017-11-20 07:32:53
25580641	2017-11-17 16:23:23	2017-11-17 16:08:28	2017-11-20 07:49:10
25581162	2017-11-17 15:48:16	2017-11-17 15:10:29	2017-11-20 07:55:46
25453959	2017-11-17 13:59:17	2017-11-17 13:45:08	2017-11-20 07:41:13
25582351	2017-11-17 14:08:09	2017-11-17 12:58:57	2017-11-20 09:13:08
25459529	2017-11-17 11:20:41	2017-11-17 11:09:29	2017-11-20 07:50:03
25581172	2017-11-17 11:33:16	2017-11-17 10:54:15	2017-11-20 08:52:23
25582160	2017-11-17 09:53:26	2017-11-17 10:02:52	2017-11-20 17:46:23
25697513	2017-12-18 20:10:05		2017-12-18 20:10:05
25695942	2017-12-15 20:09:58		2017-12-15 20:09:58
25581364	2017-11-16 15:16:42	2017-11-16 18:11:39	2017-11-17 14:42:43
25573897	2017-11-16 15:16:08	2017-11-16 14:58:43	2017-11-17 08:28:37
25558881	2017-11-16 15:17:01	2017-11-16 18:32:06	2017-11-17 09:50:13
25574554	2017-11-16 15:17:17	2017-11-16 17:33:01	2017-11-20 16:27:19
25574276	2017-11-15 16:24:22		2017-11-15 16:24:22
25573698	2017-11-15 14:32:47	2017-11-15 14:47:50	2017-11-16 11:37:14
25577219	2017-11-15 14:09:50		2017-11-15 15:01:59
25574611	2017-11-15 11:47:04	2017-11-15 12:10:13	2017-11-16 11:35:55
25571683	2017-11-15 13:10:56		2017-11-15 15:01:45
25483013	2017-11-15 12:34:28
25444885	2017-11-15 12:03:42		2017-11-15 16:54:30
25577333	2017-11-15 09:24:23	2017-11-15 09:08:22	2017-11-16 09:22:07
25578873	2017-11-14 17:15:06	2017-11-16 15:36:12	2017-11-16 15:54:42
25576622	2017-11-14 16:53:33	2017-11-14 17:06:33	2017-11-16 11:58:32
25575929	2017-11-14 15:26:40	2017-11-14 16:15:51	2017-11-14 17:44:33
25576701	2017-11-14 15:11:53	2017-11-14 15:02:09	2017-11-16 10:02:43
25575433	2017-11-14 14:18:17	2017-11-14 14:06:41	2017-11-16 09:32:29
25574356	2017-11-14 14:17:42	2017-11-14 13:33:39	2017-11-16 12:04:36
25578888	2017-11-14 12:25:41	2017-11-14 12:46:18	2017-11-16 10:16:54
25577476	2017-11-14 12:44:24	2017-11-14 11:43:34	2017-11-16 10:08:17
25574089	2017-11-13 17:32:21	2017-11-13 17:23:28	2017-11-14 11:17:29
25565945	2017-11-13 17:13:38	2017-11-13 15:49:39	2017-11-16 10:11:53
25577529	2017-11-21 09:27:15		2017-11-21 09:27:15
25563579	2017-11-13 17:11:54	2017-11-13 15:40:09	2017-11-13 17:11:54
25549261	2017-11-13 15:44:45	2017-11-13 15:24:59	2017-11-14 11:20:39
25549867	2017-11-13 13:56:36	2017-11-13 14:48:05	2017-11-14 14:22:16
25558871	2017-11-13 14:15:24	2017-11-13 12:48:23	2017-11-14 10:46:57
25577485	2017-11-13 11:35:50		2017-11-15 16:34:27
25575364	2017-11-13 11:42:32	2017-11-13 11:12:25	2017-11-14 10:33:28
25515876	2017-11-13 10:09:27	2017-11-13 09:47:59	2017-11-14 11:38:49
25575860	2017-11-13 12:29:15	2017-11-13 09:17:49	2017-11-13 12:29:15
25562841	2017-11-10 17:39:06	2017-11-10 17:32:21	2017-11-10 18:00:59
25562520	2017-11-10 13:09:25	2017-11-10 12:45:48	2017-11-13 11:22:47
25563390	2017-11-10 12:39:09	2017-11-10 12:32:01	2017-11-10 13:58:40
25559135	2017-11-10 12:33:50	2017-11-10 11:29:04	2017-11-13 13:08:22
25558889	2017-11-10 11:28:27	2017-11-10 10:47:16	2017-11-13 10:58:13
25573396	2017-11-10 10:45:21	2017-11-10 10:29:52	2017-11-13 11:27:25
25573132	2017-11-10 10:00:46	2017-11-10 09:49:05	2017-11-14 17:02:58
25573250	2017-11-09 17:50:46	2017-11-10 09:20:02	2017-11-10 14:04:15
25574420	2017-11-09 16:58:50		2017-11-09 18:16:33
25572899	2017-11-09 14:34:49		2017-11-09 18:12:00
25573609	2017-11-09 14:29:06		2017-11-09 18:10:20
25573822	2017-11-09 13:01:09	2017-11-09 13:59:36	2017-11-09 14:30:07
25571713	2017-11-09 13:07:08		2017-11-09 13:55:05
25564024	2017-11-09 11:46:15		2017-11-09 13:53:50
25562501	2017-11-08 17:21:21	2017-11-08 17:25:11	2017-11-09 09:14:39
25572805	2017-11-08 17:44:18	2017-11-08 17:21:37	2017-11-09 10:59:41
25561702	2017-11-08 16:56:14	2017-11-08 16:02:01	2017-11-08 17:49:18
25562263	2017-11-08 17:01:00	2017-11-08 16:37:46	2017-11-09 10:30:07
25545738	2017-11-08 15:55:43	2017-11-08 15:31:15	2017-11-09 10:04:33
25558128	2017-11-08 15:12:41	2017-11-08 13:32:49	2017-11-09 10:02:49
25558140	2017-11-08 13:24:04	2017-11-08 12:20:49	2017-11-09 10:01:23
25558147	2017-11-08 12:21:16	2017-11-08 11:47:52	2017-11-09 09:16:29
25559916	2017-11-08 11:30:03	2017-11-08 11:04:39	2017-11-09 09:57:07
25581858	2017-11-16 20:08:55		2017-11-16 20:08:55
25573676	2017-11-07 17:53:53	2017-11-08 10:29:20	2017-11-08 11:02:17
25564084	2017-11-07 17:47:57	2017-11-07 17:16:23	2017-11-08 10:14:50
25565684	2017-11-07 16:55:53		2017-11-07 17:00:00
25571708	2017-11-07 16:12:58		2017-11-08 15:49:43
25563539	2017-11-07 14:39:47		2017-11-07 14:39:47
25564080	2017-11-07 14:49:07		2017-11-07 14:49:07
25564052	2017-11-07 13:03:37	2017-11-07 12:32:45	2017-11-07 13:57:53
25571718	2017-11-07 11:02:19		2017-11-07 11:13:14
25565207	2017-11-07 08:37:26	2017-11-07 08:33:42	2017-11-08 09:51:08
25572926	2017-11-06 16:28:59		2017-11-07 10:03:15
25564487	2017-11-06 17:38:49	2017-11-06 17:01:15	2017-11-08 10:05:49
25459539	2017-11-06 17:49:43		2017-11-07 09:35:23
25549102	2017-11-06 15:15:00		2017-11-08 17:58:39
25481362	2017-11-06 14:42:59		2017-11-06 14:47:30
25551201	2017-11-06 14:37:10	2017-11-06 13:36:47	2017-11-06 14:37:10
25564049	2017-11-07 09:40:08		2017-11-07 10:08:16
25487077	2017-11-06 15:11:38	2017-11-06 14:54:39	2017-11-08 09:45:38
25479087	2017-11-06 14:15:01	2017-11-06 13:44:14	2017-11-08 09:41:07
25475946	2017-11-06 11:28:43	2017-11-06 11:11:00	2017-11-08 09:35:03
25564812	2017-11-03 16:41:01	2017-11-03 16:30:58	2017-11-06 09:21:59
25561011	2017-11-03 16:21:51	2017-11-03 16:05:15	2017-11-06 09:54:56
25565167	2017-11-03 15:55:46	2017-11-03 15:14:19	2017-11-06 11:55:48
25564884	2017-11-03 13:32:00	2017-11-06 07:43:00	2017-11-03 13:32:00
25564851	2017-11-03 13:48:07	2017-11-03 12:02:36	2017-11-06 12:00:00
25564926	2017-11-03 11:58:36	2017-11-03 11:11:38	2017-11-06 12:04:02
25565665	2017-11-03 10:10:52		2017-11-03 10:54:37
25563803	2017-11-03 09:58:41	2017-11-06 10:15:08	2017-11-03 10:15:08
25564751	2017-11-02 18:27:48	2017-11-02 18:11:38	2017-11-06 10:41:21
25564477	2017-11-02 17:34:52	2017-11-02 17:04:48	2017-11-03 10:33:51
25564835	2017-11-28 11:41:26		2017-11-28 11:41:26
25564483	2017-11-02 16:26:33	2017-11-03 09:53:33	2017-11-02 17:39:22
25558300	2017-11-02 16:47:17	2017-11-02 16:39:52	2017-11-03 14:47:01
25564798	2017-11-02 18:01:42	2017-11-02 17:38:03	2017-11-03 10:51:27
25564792	2017-11-02 13:53:43	2017-11-02 11:44:12	2017-11-02 16:22:35
25592021	2017-11-27 20:09:19		2017-11-27 20:09:19
25563264	2017-11-02 09:01:11	2017-11-02 08:16:46	2017-11-02 15:27:24
25561139	2017-11-02 09:26:21	2017-11-02 09:12:39	2017-11-02 15:22:51
25558569	2017-11-01 15:49:03	2017-11-01 15:37:18	2017-11-02 15:33:41
25558451	2017-11-01 14:57:51	2017-11-01 14:39:12	2017-11-03 09:11:57
25560227	2017-11-01 17:03:22	2017-11-01 16:51:50	2017-11-02 15:20:51
25559962	2017-11-01 16:35:14	2017-11-01 16:00:02	2017-11-03 08:45:12
25559812	2017-11-01 14:36:06	2017-11-01 14:02:27	2017-11-02 15:21:59
25559771	2017-11-01 14:11:19	2017-11-01 13:40:30	2017-11-02 16:18:44
25549360	2017-11-01 13:31:45	2017-11-01 13:10:30	2017-11-03 08:29:23
25488801	2017-11-01 11:12:06	2017-11-01 10:23:40	2017-11-02 10:38:10
25559235	2017-10-31 17:30:49	2017-10-31 17:02:28	2017-11-02 14:58:29
25562286	2017-10-31 15:39:30	2017-10-31 15:37:13	2017-11-03 08:14:49
25456928	2017-10-31 16:45:47	2017-10-31 15:29:57	2017-10-31 16:45:47
25544820	2017-10-31 13:33:25	2017-10-31 13:20:44	2017-10-31 16:45:17
25560281	2017-10-31 09:48:58	2017-10-31 09:32:32	2017-10-31 14:10:01
25560167	2017-10-31 14:43:22	2017-10-31 15:58:38	2017-10-31 14:43:22
25559754	2017-10-30 17:58:53		2017-10-31 17:51:36
25559472	2017-10-30 16:24:15	2017-10-30 15:42:23	2017-10-31 11:17:08
25558681	2017-10-30 16:00:36	2017-10-30 15:20:49	2017-11-02 09:50:24
25557120	2017-10-30 14:20:11	2017-10-30 13:46:50	2017-11-02 10:41:57
25548957	2017-10-30 14:47:48	2017-10-30 14:32:39	2017-10-31 11:05:50
25552555	2017-10-30 14:33:40	2017-10-30 13:33:42	2017-10-31 16:23:01
25426103	2017-10-30 13:37:24	2017-10-30 13:18:37	2017-10-31 14:18:14
25444391	2017-10-30 13:11:14	2017-10-30 12:20:11	2017-10-31 12:55:43
25547168	2017-10-30 11:25:41	2017-10-30 10:50:25	2017-10-31 11:03:31
25480462	2017-10-30 10:44:47	2017-10-30 10:07:03	2017-10-31 11:01:34
25559241	2017-10-27 16:00:58	2017-10-27 15:37:18	2017-10-27 16:00:58
25560065	2017-10-27 17:24:16	2017-10-27 17:09:00	2017-10-27 17:24:16
25559256	2017-10-27 15:33:34	2017-10-27 15:10:52	2017-10-27 15:33:34
25450346	2017-10-27 15:01:54	2017-10-27 14:52:02	2017-10-27 15:01:54
25559237	2017-10-27 12:42:00	2017-10-27 11:33:23	2017-10-27 12:42:00
25554089	2017-10-27 13:49:26	2017-10-27 13:24:10	2017-10-27 15:07:38
25554145	2017-10-27 10:44:46	2017-10-27 10:55:39	2017-10-27 11:28:53
25552579	2017-10-27 10:32:16	2017-10-27 10:00:32	2017-10-27 10:32:16
25571790	2017-11-03 20:08:34		2017-11-03 20:08:34
25558792	2017-10-26 15:23:10	2017-10-26 15:02:40	2017-10-30 17:29:23
25481681	2017-10-26 15:15:31	2017-10-26 14:31:33	2017-10-26 15:31:00
25557152	2017-10-26 17:06:26	2017-10-26 16:25:00	2017-10-26 17:07:38
25553800	2017-10-26 17:11:30	2017-10-26 16:41:30	2017-10-30 17:34:46
25555768	2017-10-26 14:48:32	2017-10-26 14:34:21	2017-10-30 17:32:06
25555091	2017-10-26 14:23:24	2017-10-26 13:42:45	2017-10-30 17:36:40
25556441	2017-10-26 11:37:30	2017-10-26 11:16:10	2017-10-30 17:56:39
25551631	2017-10-26 11:13:13	2017-10-26 10:14:18	2017-10-30 17:45:59
25555386	2017-10-25 16:54:19	2017-10-25 16:29:13	2017-10-26 09:19:31
25557684	2017-10-25 16:21:01	2017-10-25 15:29:34	2017-10-26 09:37:02
25554750	2017-10-25 14:53:48	2017-10-25 14:48:27	2017-10-26 09:16:45
25553689	2017-10-25 14:29:14		2017-11-01 09:19:09
25551671	2017-10-25 13:55:57	2017-10-25 13:40:31	2017-10-26 09:34:09
25553561	2017-10-25 13:22:12	2017-10-25 13:10:39	2017-10-26 09:17:29
25549784	2017-10-25 12:57:35	2017-10-25 12:44:06	2017-10-26 09:21:25
25548060	2017-10-25 11:50:29		2017-10-26 09:23:56
25436213	2017-10-25 11:35:35	2017-10-25 11:06:53	2017-10-26 09:15:10
25484253	2017-10-25 10:57:02	2017-10-25 10:32:37	2017-10-26 09:20:01
25582017	2017-11-16 20:08:55		2017-11-16 20:08:55
25470230	2017-10-24 14:30:38		2017-10-24 14:30:38
25554986	2017-10-24 14:03:19		2017-10-24 14:03:19
25564450	2017-11-01 20:08:29		2017-11-01 20:08:29
25549355	2017-10-23 14:27:15		2017-10-23 14:27:15
25546286	2017-10-23 13:45:44		2017-10-23 15:36:24
25553902	2017-10-23 12:09:27		2017-10-23 15:38:19
25486514	2017-10-23 11:49:48		2017-10-23 14:36:19
25548959	2017-10-23 10:52:11	2017-10-24 08:49:09	2017-10-23 15:36:54
25553455	2017-10-24 09:38:17		2017-10-27 17:52:45
25486939	2017-10-20 15:24:17	2017-10-20 15:58:13	2017-10-20 16:22:29
25555315	2017-10-20 14:26:02	2017-10-20 13:52:32	2017-10-24 10:47:01
25488750	2017-10-20 14:58:55	2017-10-20 14:29:41	2017-10-20 14:58:55
25551101	2017-10-20 13:29:37	2017-10-20 13:11:18	2017-10-23 16:27:37
25553876	2017-10-20 14:20:37		2017-10-20 16:32:17
25463322	2017-10-20 14:23:05	2017-10-20 13:59:51	2017-10-20 14:23:05
25483249	2017-10-20 12:42:58	2017-10-31 08:19:39	2017-10-26 17:58:39
25549847	2017-10-20 10:49:52		2017-10-20 16:43:40
25552837	2017-10-20 14:41:51		2017-10-24 15:47:03
25553594	2017-10-19 16:47:31	2017-10-19 15:30:37	2017-10-19 16:47:31
25552423	2017-10-19 16:33:54		2017-10-26 11:49:48
25550425	2017-10-19 14:48:05	2017-10-19 14:51:34	2017-10-19 16:48:02
25552605	2017-10-19 17:12:31	2017-11-01 08:32:08	2017-11-01 08:11:27
25560161	2017-10-26 20:08:15		2017-10-26 20:08:15
25550077	2017-10-18 18:06:00		2017-10-19 12:48:26
25549382	2017-10-19 15:06:40		2017-10-20 16:46:24
25483297	2017-10-18 16:23:43		2017-10-19 13:45:56
25550303	2017-10-18 17:34:47	2017-10-19 18:31:30	2017-10-19 12:39:26
25491502	2017-10-18 16:16:30		2017-10-19 12:46:39
25484434	2017-10-18 15:41:18		2017-10-19 12:45:17
25480942	2017-10-18 15:07:21	2017-10-19 18:16:46	2017-10-19 12:39:49
25484427	2017-10-18 14:19:34	2017-10-19 18:46:23	2017-10-19 12:42:14
25466772	2017-10-18 11:42:57	2017-10-19 18:42:47	2017-10-19 12:40:13
25431210	2017-10-18 11:22:02	2017-10-20 09:10:27	2017-10-19 12:50:10
25577435	2017-11-10 20:08:47		2017-11-10 20:08:47
25547917	2017-10-16 17:24:31		2017-10-17 15:25:15
25543947	2017-10-16 15:50:46		2017-10-17 15:26:06
25490633	2017-10-16 14:12:28		2017-10-19 09:40:53
25483618	2017-10-16 15:14:00		2017-10-17 15:32:41
25548386	2017-10-16 13:19:48		2017-10-17 15:32:06
25480642	2017-10-16 09:59:23		2017-10-17 16:39:20
25546784	2017-10-13 16:44:46		2017-10-16 16:19:33
25489613	2017-10-13 16:12:20		2017-10-13 16:12:20
25484746	2017-10-13 14:05:55	2017-10-13 13:40:45	2017-10-16 10:40:13
25470228	2017-10-13 13:12:51	2017-10-13 12:29:33	2017-10-13 14:01:32
25481580	2017-10-13 11:41:18	2017-10-13 11:45:55	2017-10-16 10:19:49
25543828	2017-10-13 11:01:30	2017-10-13 10:39:14	2017-10-16 09:59:44
25547626	2017-10-13 10:29:21	2017-10-13 09:58:05	2017-10-16 10:27:43
25634227	2017-12-04 20:09:33		2017-12-04 20:09:33
25544965	2017-10-12 12:30:05		2017-10-13 09:46:29
25544992	2017-10-12 13:18:36	2017-10-12 15:46:59	2017-10-12 16:06:42
25552328	2017-10-17 20:07:53		2017-10-17 20:07:53
25552327	2017-10-17 20:07:53		2017-10-17 20:07:53
25509879	2017-10-11 17:29:24	2017-10-11 16:22:49	2017-10-12 11:56:51
25546890	2017-10-11 16:17:38	2017-10-11 16:34:15	2017-10-12 08:37:53
25495573	2017-10-11 15:02:34	2017-10-11 16:05:49	2017-10-12 10:16:05
25504438	2017-10-11 14:49:08	2017-10-12 08:58:23	2017-10-12 16:56:06
25513924	2017-10-11 16:24:09	2017-10-11 15:18:59	2017-10-11 17:01:27
25489880	2017-10-11 14:06:54	2017-10-11 13:38:43	2017-10-12 11:54:23
25493185	2017-10-11 14:56:16	2017-10-11 14:13:27	2017-10-12 12:02:03
25490625	2017-10-11 14:35:08	2017-10-11 11:46:36	2017-10-11 16:53:46
25489024	2017-10-11 10:43:02	2017-10-11 11:59:48	2017-10-12 09:57:01
25447963	2017-10-11 11:26:16		2017-10-11 16:40:18
25604396	2017-11-29 20:09:22		2017-11-29 20:09:22
25557504	2017-10-24 20:08:11		2017-10-24 20:08:11
25544843	2017-10-10 15:34:43	2017-10-10 15:26:23	2017-10-11 11:30:43
25545887	2017-10-10 14:53:27	2017-10-10 14:44:17	2017-10-11 11:54:25
25485480	2017-10-10 14:31:56	2017-10-10 14:01:58	2017-10-11 16:00:20
25544842	2017-10-10 13:57:02	2017-10-10 13:32:26	2017-10-11 11:34:07
25544000	2017-10-09 15:59:33	2017-10-09 16:51:37	2017-10-10 08:29:18
25486481	2017-10-09 15:57:42	2017-10-09 14:19:16	2017-10-10 10:57:45
25461420	2017-10-09 13:42:24	2017-10-09 13:32:24	2017-10-10 10:54:19
25475423	2017-10-09 12:39:39	2017-10-09 12:55:14	2017-10-10 17:19:54
25475444	2017-10-09 12:56:09	2017-10-09 11:37:56	2017-10-09 17:42:08
25489025	2017-10-09 12:26:21		2017-10-10 16:47:13
25578443	2017-11-13 20:08:49		2017-11-13 20:08:49
25552206	2017-10-17 20:07:53		2017-10-17 20:07:53
25544060	2017-10-06 16:12:53	2017-10-06 15:46:56	2017-10-09 09:05:09
25515086	2017-10-13 14:20:50		2017-10-13 14:51:24
25490339	2017-10-06 15:57:42	2017-10-06 14:54:38	2017-10-06 17:59:40
25491268	2017-10-06 14:32:35	2017-10-06 13:54:09	2017-10-09 08:55:49
25480585	2017-10-06 13:32:51	2017-10-06 13:00:18	2017-10-09 08:35:42
25312079	2017-10-06 11:35:58	2017-10-06 11:35:43	2017-10-09 08:27:41
25463950	2017-10-06 10:19:08	2017-10-06 17:29:18	2017-10-06 11:25:52
25490342	2017-10-06 10:46:37	2017-10-06 10:02:22	2017-10-09 08:42:03
25491954	2017-10-05 14:43:46	2017-10-05 14:20:06	2017-10-06 08:48:35
25496091	2017-10-05 13:56:13	2017-10-05 13:19:11	2017-10-06 10:00:23
25488655	2017-10-05 10:48:29	2017-10-05 12:54:47	2017-10-06 08:23:56
25487007	2017-10-05 10:45:10	2017-10-05 10:26:41	2017-10-05 16:38:23
25491604	2017-10-04 15:46:48	2017-10-04 16:10:56	2017-10-05 16:05:49
25488311	2017-10-04 14:52:39	2017-10-04 15:09:58	2017-10-05 09:14:28
25488588	2017-10-04 14:50:08	2017-10-04 14:17:06	2017-10-05 08:55:35
25483758	2017-10-04 14:01:47	2017-10-04 13:52:07	2017-10-05 10:00:35
25484687	2017-10-04 13:39:21	2017-10-04 12:47:02	2017-10-05 10:19:50
25483071	2017-10-04 12:24:31		2017-10-04 17:46:57
25491973	2017-10-04 12:02:40	2017-10-04 10:34:42	2017-10-05 08:33:00
25431774	2017-10-04 11:39:28	2017-10-04 10:41:28	2017-10-05 11:21:05
25687495	2017-12-07 20:09:42		2017-12-07 20:09:42
25563844	2017-10-31 20:08:24		2017-10-31 20:08:24
25468193	2017-10-03 16:28:51	2017-10-03 15:39:42	2017-10-04 10:20:32
25488857	2017-10-03 14:13:07	2017-10-03 13:39:49	2017-10-04 08:50:15
25490637	2017-10-03 14:48:19	2017-10-03 14:39:11	2017-10-04 10:22:44
25483771	2017-10-03 15:28:22	2017-10-03 15:15:14	2017-10-04 08:26:58
25485185	2017-10-03 12:20:17	2017-10-03 12:18:33	2017-10-04 08:37:04
25488219	2017-10-03 17:40:24	2017-10-03 17:04:36	2017-10-04 18:09:28
25553390	2017-10-18 20:07:55		2017-10-18 20:07:55
25488385	2017-10-02 17:08:05	2017-10-02 16:42:32	2017-10-03 09:47:56
25487795	2017-10-02 16:13:58	2017-10-02 15:38:42	2017-10-03 11:01:03
25429629	2017-10-02 15:11:29	2017-10-02 14:34:30	2017-10-03 10:31:44
25484647	2017-10-02 14:16:04	2017-10-02 13:44:32	2017-10-03 09:20:03
25481326	2017-10-02 12:50:33	2017-10-02 12:27:50	2017-10-03 09:17:33
25483000	2017-10-02 12:05:57	2017-10-02 11:31:54	2017-10-03 10:35:57
25479769	2017-10-02 11:00:35	2017-10-02 10:44:52	2017-10-03 08:40:09
25475417	2017-10-02 10:06:59	2017-10-02 09:54:01	2017-10-03 10:33:36
25486737	2017-09-29 17:15:19	2017-09-29 16:49:32	2017-09-29 17:15:19
25486273	2017-09-29 16:53:19	2017-09-29 16:21:59	2017-09-29 17:49:34
25484953	2017-09-29 16:26:21		2017-09-29 16:30:19
25478436	2017-09-29 13:33:08	2017-09-29 13:38:04	2017-09-29 17:27:49
25475335	2017-09-29 14:27:58	2017-09-29 13:58:26	2017-09-29 17:55:59
25473526	2017-09-29 11:22:16	2017-09-29 11:28:02	2017-09-29 14:25:13
25471483	2017-09-29 11:57:41	2017-09-29 11:23:10	2017-09-29 18:03:00
25447972	2017-09-29 10:42:22	2017-09-29 10:24:01	2017-09-29 18:12:31
25577099	2017-11-10 20:08:47		2017-11-10 20:08:47
25563462	2017-10-31 20:08:24		2017-10-31 20:08:24
25486214	2017-09-28 14:56:35	2017-09-28 14:36:04	2017-09-28 15:07:11
25486639	2017-09-28 15:33:04	2017-09-28 15:11:58	2017-09-28 17:10:48
25483679	2017-09-28 14:52:56	2017-09-28 14:03:20	2017-09-28 17:23:55
25472062	2017-09-28 13:54:09	2017-09-28 13:26:57	2017-09-28 17:19:51
25484664	2017-09-27 15:31:46	2017-09-27 15:16:11	2017-09-27 16:00:27
25467933	2017-09-27 15:02:06	2017-09-27 14:46:48	2017-09-27 16:00:42
25486032	2017-09-27 15:04:26	2017-09-27 15:18:18	2017-09-27 17:30:18
25417752	2017-09-27 14:02:37		2017-09-27 15:42:16
25457432	2017-09-27 14:20:50	2017-09-27 13:16:59	2017-09-28 09:09:09
25483759	2017-09-27 11:42:40	2017-09-27 11:26:11	2017-09-28 08:22:39
25485495	2017-09-27 11:13:27	2017-09-27 10:50:01	2017-09-28 09:09:34
25561361	2017-11-14 20:08:53		2017-11-14 20:08:53
25491991	2017-10-03 20:07:17		2017-10-03 20:07:17
25483814	2017-09-26 17:51:11	2017-09-27 08:39:10	2017-09-27 10:12:28
25483204	2017-09-26 14:04:58	2017-09-26 13:40:02	2017-09-26 16:29:03
25484325	2017-09-26 14:33:35	2017-09-26 14:09:50	2017-09-26 17:01:20
25477109	2017-09-26 15:39:50	2017-09-26 14:26:29	2017-09-26 17:17:54
25483153	2017-09-25 17:25:20	2017-09-26 10:26:10	2017-09-26 10:54:17
25480417	2017-09-25 16:26:00	2017-09-25 16:04:23	2017-09-26 09:10:37
25450207	2017-09-25 16:33:10	2017-09-25 16:17:53	2017-09-26 08:20:21
25483493	2017-09-25 15:56:17	2017-09-25 15:13:10	2017-09-26 09:29:09
25467844	2017-09-25 14:34:09	2017-09-25 14:12:34	2017-09-25 17:46:03
25477180	2017-09-25 14:00:51	2017-09-25 13:18:14	2017-09-26 08:56:28
25457422	2017-09-25 16:04:26	2017-09-25 15:29:08	2017-09-25 17:31:35
25438021	2017-09-25 12:15:01	2017-09-25 14:07:38	2017-09-25 16:24:08
25436108	2017-09-25 11:25:10	2017-09-25 11:02:03	2017-09-25 16:42:56
25468008	2017-09-25 10:27:23	2017-09-25 10:08:28	2017-09-25 16:38:12
25576016	2017-11-09 20:08:43		2017-11-09 20:08:43
25571234	2017-11-03 20:08:33		2017-11-03 20:08:33
25551367	2017-10-16 20:07:50		2017-10-16 20:07:50
25480741	2017-09-22 16:59:35		2017-09-22 16:59:35
25477804	2017-09-22 15:58:45		2017-09-22 16:25:30
25481597	2017-09-22 15:20:41		2017-09-22 16:23:21
25481060	2017-09-22 13:55:23	2017-09-22 15:20:58	2017-09-25 09:25:15
25481045	2017-09-22 14:30:07		2017-09-22 17:04:18
25480425	2017-09-22 12:46:50		2017-09-22 16:22:04
25481236	2017-09-22 11:20:32		2017-09-22 16:21:42
25482329	2017-09-22 10:38:13		2017-09-22 11:02:02
25481314	2017-09-21 15:27:21		2017-09-21 16:17:09
25480515	2017-09-21 14:45:11	2017-09-22 16:07:07	2017-09-21 14:45:11
25479331	2017-09-21 14:11:51		2017-09-21 14:48:28
25478013	2017-09-21 13:54:15		2017-09-22 09:56:26
25476498	2017-09-21 12:16:18		2017-09-21 12:16:18
25469653	2017-09-21 10:26:26		2017-09-21 11:46:38
25478877	2017-09-20 17:09:46		2017-09-20 17:12:57
25467801	2017-09-20 16:44:19		2017-09-20 16:44:19
25477054	2017-09-20 15:55:02		2017-09-20 15:59:13
25475643	2017-09-20 14:34:00	2017-09-21 09:10:48	2017-09-20 14:34:00
25478808	2017-09-20 13:42:29		2017-09-20 13:42:29
25466337	2017-09-20 12:56:00	2017-09-21 09:28:45	2017-09-20 13:01:21
25476715	2017-09-20 11:45:54	2017-09-21 09:01:06	2017-09-20 12:38:17
25427834	2017-09-20 11:09:49		2017-09-21 14:23:15
25479381	2017-09-20 10:22:50		2017-09-20 10:36:23
25563463	2017-10-31 20:08:25		2017-10-31 20:08:25
25478969	2017-09-19 15:58:35	2017-09-19 16:08:44	2017-09-20 07:52:45
25476826	2017-09-19 16:13:06		2017-09-19 17:09:18
25477636	2017-09-19 15:45:10	2017-09-20 14:50:43	2017-09-19 16:12:26
25477390	2017-09-19 13:00:49		2017-09-19 13:17:53
25475366	2017-09-19 12:40:51	2017-09-19 15:04:48	2017-09-20 16:05:25
25476258	2017-09-19 11:14:37	2017-09-20 08:22:46	2017-09-19 11:57:01
25477120	2017-09-19 09:44:11		2017-09-19 10:58:02
25475052	2017-09-18 17:44:26		2017-09-18 17:50:40
25470213	2017-09-18 15:35:27		2017-09-18 15:35:27
25463603	2017-09-18 14:31:11		2017-09-18 15:19:49
25475376	2017-09-18 15:26:58	2017-09-18 14:53:12	2017-09-19 09:39:31
25476829	2017-09-18 12:47:40		2017-09-18 13:29:26
25459908	2017-09-18 12:19:58		2017-09-18 13:29:07
25476820	2017-09-18 11:34:43		2017-09-18 13:28:42
25476096	2017-09-18 11:08:57		2017-09-18 13:26:50
25489658	2017-09-29 20:07:04		2017-09-29 20:07:04
25551924	2017-10-17 20:07:53		2017-10-17 20:07:53
25475922	2017-09-15 17:17:32		2017-09-15 17:17:32
25470219	2017-09-15 16:57:46	2017-09-15 16:18:08	2017-09-19 10:13:03
25447929	2017-09-15 16:07:25		2017-09-15 16:11:14
25464224	2017-09-15 13:15:48		2017-09-15 16:48:26
25475867	2017-09-15 12:50:06		2017-09-15 16:40:08
25460891	2017-09-15 12:01:15	2017-09-18 11:58:17	2017-09-15 16:35:44
25476090	2017-09-15 11:08:13		2017-09-15 16:32:25
25465501	2017-09-15 10:15:22		2017-09-15 17:16:16
25471500	2017-09-14 12:50:22		2017-09-14 14:06:52
25469156	2017-09-14 12:34:48		2017-09-14 12:34:48
25473770	2017-09-14 12:08:33		2017-09-14 12:08:33
25474145	2017-09-14 11:00:14	2017-09-14 14:46:45	2017-09-14 11:31:03
25474204	2017-09-14 10:33:58		2017-09-14 10:33:58
25470229	2017-09-13 16:50:29		2017-09-13 16:50:29
25469673	2017-09-13 15:17:08		2017-09-13 18:02:55
25466467	2017-09-13 14:30:08		2017-09-13 14:33:30
25464952	2017-09-13 13:59:57		2017-09-13 18:02:15
25464151	2017-09-13 11:56:52		2017-09-13 18:01:45
25448696	2017-09-13 10:27:18		2017-09-13 18:01:22
25564455	2017-11-01 20:08:29		2017-11-01 20:08:29
25546703	2017-10-10 20:07:38		2017-10-10 20:07:38
25472098	2017-09-12 14:22:09		2017-09-12 14:22:09
25472059	2017-09-12 13:45:41		2017-09-12 13:45:41
25474022	2017-09-12 10:18:15		2017-09-12 11:01:37
25546849	2017-10-10 20:07:37		2017-10-10 20:07:37
25470859	2017-09-11 16:18:54	2017-09-12 11:32:01	2017-09-11 16:34:43
25467257	2017-09-11 15:43:36		2017-09-11 17:58:24
25464721	2017-09-11 15:01:18		2017-09-11 15:01:18
25463313	2017-09-11 14:12:20		2017-09-11 14:17:26
25471871	2017-09-11 13:30:13	2017-09-12 09:45:08	2017-09-11 13:30:13
25463845	2017-09-11 11:57:33		2017-09-11 12:00:37
25413841	2017-09-11 11:33:34		2017-09-11 11:33:34
25457899	2017-09-11 11:15:23		2017-09-11 11:19:02
25464216	2017-09-08 15:30:23		2017-09-11 09:57:56
25462793	2017-09-08 15:39:51	2017-09-12 08:00:24	2017-09-08 16:18:38
25468312	2017-09-08 14:30:26		2017-09-08 14:30:26
25463626	2017-09-08 14:54:38		2017-09-08 15:50:47
25460671	2017-09-08 13:50:36		2017-09-08 14:35:01
25470808	2017-09-08 13:49:41		2017-09-08 14:00:30
25457352	2017-09-08 11:06:02		2017-09-08 14:02:28
25470002	2017-09-07 14:16:33		2017-09-07 14:19:08
25465810	2017-09-07 13:51:31		2017-09-07 15:30:44
25465257	2017-09-07 12:10:06		2017-09-07 12:10:06
25465213	2017-09-07 11:14:48		2017-09-08 08:34:48
25464516	2017-09-06 16:38:15		2017-09-07 08:35:36
25465515	2017-09-06 15:41:22		2017-09-06 15:50:18
25458777	2017-09-06 14:19:52		2017-09-06 14:19:52
25456900	2017-09-06 12:56:54	2017-09-06 13:16:42	2017-09-06 13:21:45
25454055	2017-09-06 11:58:18		2017-09-06 11:58:18
25433857	2017-09-06 11:39:47		2017-09-06 11:39:47
25431192	2017-09-06 10:26:10		2017-09-06 10:26:10
25417683	2017-09-05 14:02:59		2017-09-05 14:07:10
25465390	2017-09-05 12:49:46		2017-09-05 12:52:25
25466883	2017-09-05 12:08:44		2017-09-05 12:08:44
25554124	2017-10-19 20:07:56		2017-10-19 20:07:56
25459820	2017-09-04 14:35:17		2017-09-04 15:23:33
25464137	2017-09-04 14:09:13	2017-09-04 13:42:41	2017-09-05 09:41:15
25458528	2017-09-04 14:00:59	2017-09-05 10:38:13	2017-09-05 07:51:53
25456847	2017-09-04 13:11:05		2017-09-05 07:50:49
25456803	2017-09-04 12:02:11		2017-09-07 13:54:51
25464915	2017-09-04 10:57:04	2017-09-04 11:11:12	2017-09-05 09:43:33
25284420	2017-09-04 10:45:06	2017-09-04 10:20:06	2017-09-05 09:45:23
25466457	2017-09-04 09:56:48	2017-09-04 10:01:07	2017-09-05 09:48:50
25463923	2017-09-01 17:28:41		2017-09-01 17:28:41
25466507	2017-09-01 16:34:43		2017-09-01 16:34:43
25464492	2017-09-01 15:39:45		2017-09-01 15:39:45
25465047	2017-09-01 14:01:05	2017-09-01 14:14:46	2017-09-01 14:19:40
25465069	2017-09-01 13:22:42	2017-09-01 13:06:46	2017-09-01 13:24:54
25458090	2017-09-01 13:52:02		2017-09-01 13:52:02
25420849	2017-09-01 11:25:19		2017-09-04 09:19:51
25462908	2017-08-31 16:36:43		2017-09-01 08:32:35
25447734	2017-08-31 18:55:02	2017-08-31 18:30:55	2017-09-04 11:31:45
25400496	2017-08-31 16:53:49	2017-08-31 16:40:59	2017-09-01 08:37:07
25463964	2017-08-31 17:22:40		2017-09-01 08:45:55
25480214	2017-09-19 20:06:37		2017-09-19 20:06:37
25463543	2017-09-04 09:24:22		2017-09-04 09:24:22
25461440	2017-08-30 17:06:48	2017-08-31 16:23:01	2017-08-31 14:52:19
25427940	2017-08-30 15:11:33		2017-08-30 15:11:33
25456975	2017-08-30 14:43:50		2017-08-30 14:48:41
25458469	2017-08-30 14:00:09	2017-08-31 14:06:52	2017-08-30 14:08:39
25459936	2017-08-30 13:29:39		2017-08-30 13:29:39
25456709	2017-08-30 11:58:50		2017-08-30 11:58:50
25458034	2017-08-30 10:44:00		2017-08-30 10:44:00
25590617	2017-11-24 20:09:13		2017-11-24 20:09:13
25461768	2017-08-29 17:48:38		2017-08-29 18:06:46
25461252	2017-08-28 16:28:37		2017-08-28 16:28:37
25461292	2017-08-28 15:55:43		2017-08-28 15:58:35
25455705	2017-08-28 14:54:02		2017-08-28 14:54:02
25456837	2017-08-28 15:38:23		2017-08-28 15:42:13
25458438	2017-08-28 13:45:59		2017-08-28 13:51:54
25353297	2017-08-28 12:07:14	2017-08-28 12:12:29	2017-08-28 16:07:29
25461181	2017-08-28 11:41:34		2017-08-28 11:46:53
25453652	2017-08-25 14:56:53		2017-08-25 14:56:53
25446288	2017-08-25 13:47:03		2017-08-25 13:47:03
25459424	2017-08-25 13:04:52		2017-08-25 13:10:20
25412567	2017-08-25 12:11:21		2017-08-28 08:22:05
25453721	2017-08-25 11:15:41		2017-08-25 11:15:41
25451934	2017-08-25 10:51:58		2017-08-25 10:51:58
25311954	2017-08-24 16:38:27		2017-08-25 08:25:14
25457510	2017-08-24 18:08:38		2017-08-24 18:08:38
25456511	2017-08-24 15:56:02		2017-08-24 16:22:30
25457486	2017-08-24 16:52:40		2017-08-24 17:17:33
25455852	2017-08-24 14:53:02	2017-08-24 16:19:52	2017-08-24 15:16:44
25454408	2017-08-24 12:54:50		2017-08-24 12:54:50
25452384	2017-08-24 13:57:18		2017-08-24 13:57:18
25454971	2017-08-24 12:26:56		2017-08-24 12:26:56
25401466	2017-08-24 11:47:33		2017-08-24 11:47:33
25452692	2017-08-23 17:35:13		2017-08-23 17:36:25
25452554	2017-08-23 16:13:23		2017-08-23 16:13:23
25453819	2017-08-23 15:40:22		2017-08-23 16:44:15
25457218	2017-08-23 15:05:07	2017-08-24 09:52:28	2017-08-25 09:51:15
25446944	2017-08-23 14:29:00		2017-08-23 16:45:59
25431276	2017-08-23 13:08:11		2017-08-23 16:46:55
25453361	2017-10-20 13:39:50	2017-10-20 13:37:51	2017-10-23 16:03:31
25434329	2017-08-23 11:19:46		2017-08-23 14:43:35
25454465	2017-08-23 10:02:27	2017-08-24 09:12:01	2017-08-24 11:01:59
25463554	2017-08-29 20:06:06		2017-08-29 20:06:06
25454390	2017-08-22 16:12:26		2017-08-22 18:07:22
25455111	2017-08-22 16:30:37		2017-08-22 18:06:05
25454050	2017-08-22 17:39:03		2017-08-22 17:57:22
25453835	2017-08-22 14:31:08	2017-08-23 15:35:25	2017-08-23 07:49:05
25450196	2017-08-22 14:49:01		2017-08-23 08:30:52
25452264	2017-08-22 13:00:30		2017-08-23 07:47:31
25449172	2017-08-22 11:16:55	2017-08-23 09:03:06	2017-08-23 07:44:35
25443268	2017-08-22 12:33:14	2017-08-23 13:56:01	2017-08-23 07:43:00
25459798	2017-08-24 20:05:53		2017-08-24 20:05:53
25446854	2017-08-18 14:40:18		2017-08-21 15:05:49
25436191	2017-08-18 13:34:27		2017-08-21 16:38:41
25451543	2017-08-18 13:21:47		2017-08-21 14:46:08
25453181	2017-08-18 12:17:10		2017-08-21 16:27:52
25453267	2017-08-18 12:16:06	2017-08-18 11:52:45	2017-08-21 16:54:54
25451990	2017-08-18 11:42:15		2017-08-21 14:43:02
25453311	2017-08-18 10:53:17		2017-08-21 16:28:26
25489091	2017-09-29 20:07:04		2017-09-29 20:07:04
25260604	2017-08-17 16:48:40		2017-08-17 16:48:40
25451996	2017-08-17 16:56:27		2017-08-21 14:45:06
25453198	2017-08-17 14:23:22	2017-08-20 07:47:39	2017-08-17 15:14:33
25453236	2017-08-17 14:29:07	2017-08-18 20:48:50	2017-08-17 15:48:09
25422022	2017-08-17 14:19:14	2017-08-20 07:00:16	2017-08-18 10:58:10
25427776	2017-08-17 11:27:04	2017-08-20 07:08:07	2017-08-17 11:45:01
25453293	2017-08-17 10:09:37		2017-08-21 14:41:08
25447261	2017-08-16 17:53:46		2017-08-16 17:53:46
25446590	2017-08-16 15:02:32		2017-08-16 17:55:22
25446685	2017-08-16 14:00:41		2017-08-16 17:55:05
25444897	2017-08-16 13:41:09		2017-08-16 17:54:47
25446131	2017-08-16 14:56:50	2017-08-16 12:45:51	2017-10-31 14:20:30
25435859	2017-08-16 11:54:03		2017-08-16 17:54:29
25434035	2017-08-16 10:41:07	2017-08-16 10:26:25	2017-08-17 08:33:40
25447628	2017-08-16 10:42:44		2017-08-16 17:54:07
25592413	2017-11-28 20:09:20		2017-11-28 20:09:20
25448850	2017-08-15 18:14:53		2017-08-17 09:40:24
25447882	2017-08-15 17:10:13		2017-08-15 17:10:13
25447635	2017-08-15 16:14:55		2017-08-17 09:42:29
25444300	2017-08-15 12:07:02	2017-08-17 11:28:12	2017-08-15 12:44:18
25474894	2017-09-12 20:06:30		2017-09-12 20:06:30
25446379	2017-08-14 16:45:29	2017-08-15 15:35:23	2017-08-15 12:32:53
25446070	2017-08-14 16:25:07		2017-08-21 16:30:29
25441922	2017-08-14 15:35:39	2017-08-15 15:30:28	2017-08-15 11:44:32
25431641	2017-08-14 14:35:31	2017-08-15 15:18:09	2017-08-15 11:13:07
25347190	2017-08-14 13:22:33	2017-08-15 15:05:28	2017-08-15 11:07:13
25429465	2017-08-14 12:05:54		2017-08-15 11:05:30
25331342	2017-08-14 11:05:29	2017-08-15 17:39:37	2017-08-15 10:53:37
25490972	2017-10-02 20:07:15		2017-10-02 20:07:15
25449386	2017-08-11 15:39:56	2017-08-11 15:29:46	2017-08-14 11:00:36
25449365	2017-08-11 14:27:58	2017-08-11 14:24:15	2017-08-11 15:05:36
25449367	2017-08-11 14:14:45		2017-08-11 14:56:36
25449289	2017-08-11 13:44:44	2017-08-11 14:04:31	2017-08-14 11:40:08
25449305	2017-08-11 13:57:47		2017-08-11 14:28:03
25449055	2017-08-11 12:46:18		2017-08-11 12:49:27
25449285	2017-08-11 12:00:17		2017-08-11 12:00:17
25449343	2017-08-11 11:16:39		2017-08-11 11:16:39
25449298	2017-08-11 10:28:20		2017-08-11 10:28:20
25447372	2017-08-10 15:34:50	2017-08-10 15:17:16	2017-08-14 10:52:07
25447358	2017-08-10 13:48:36		2017-08-10 13:48:36
25447067	2017-08-10 13:05:32		2017-08-10 13:05:32
25445715	2017-08-10 12:28:57		2017-08-10 12:28:57
25436660	2017-08-10 09:56:21		2017-08-10 11:24:00
25455206	2017-08-18 20:05:40		2017-08-18 20:05:40
25463816	2017-08-29 20:06:07		2017-08-29 20:06:07
25444841	2017-08-09 16:06:58	2017-08-09 15:57:07	2017-08-10 13:22:26
25442298	2017-08-09 15:42:01	2017-08-09 14:51:32	2017-08-10 12:59:29
25434268	2017-08-09 14:19:02		2017-08-09 14:50:16
25419617	2017-08-09 13:08:49		2017-08-09 13:08:49
25417197	2017-08-09 11:53:15		2017-08-09 12:32:29
25434481	2017-08-09 10:43:27		2017-08-09 11:30:45
25425469	2017-08-09 10:41:00	2017-08-10 16:25:30	2017-08-09 11:00:01
25435663	2017-08-08 14:05:13	2017-08-08 14:55:05	2017-08-09 09:32:07
25445762	2017-08-08 11:41:51	2017-08-08 11:32:17	2017-08-09 08:53:43
25444968	2017-08-08 12:03:31		2017-08-08 12:03:31
25428207	2017-08-07 16:08:04		2017-08-08 09:51:44
25437790	2017-08-07 15:32:23		2017-08-08 09:34:26
25435003	2017-08-07 13:57:54		2017-08-07 13:59:36
25443443	2017-08-07 12:59:07		2017-08-07 13:59:58
25260621	2017-08-07 10:42:43		2017-08-07 11:25:20
25448160	2017-08-09 20:05:20		2017-08-09 20:05:20
25443896	2017-08-04 16:51:37	2017-08-04 15:43:49	2017-08-04 16:51:37
25443851	2017-08-04 17:24:05	2017-08-04 16:57:33	2017-08-07 15:19:15
25437986	2017-08-04 14:46:20	2017-08-08 08:11:22	2017-08-04 14:46:20
25441744	2017-08-04 13:59:05	2017-08-07 08:41:05	2017-08-04 14:05:34
25435665	2017-08-04 12:18:47	2017-08-04 15:05:13	2017-08-04 12:18:47
25443146	2017-08-04 11:25:38	2017-08-04 15:36:56	2017-08-04 11:37:22
25424546	2017-08-04 10:47:03	2017-08-04 14:25:21	2017-08-04 10:59:50
25434378	2017-08-03 17:49:03	2017-08-03 17:30:11	2017-08-04 11:11:07
25442914	2017-08-03 16:24:48	2017-08-03 15:36:49	2017-08-04 13:06:23
25423948	2017-08-03 12:55:57		2017-08-03 12:55:57
25433768	2017-08-03 12:22:44	2017-08-04 13:24:56	2017-08-04 12:22:05
25435377	2017-08-03 14:20:12	2017-08-04 10:08:01	2017-08-03 14:20:12
25418924	2017-08-03 11:38:37		2017-08-03 13:22:54
25437716	2017-08-03 13:23:50	2017-08-03 15:01:23	2017-08-04 10:34:54
25441952	2017-08-03 11:37:20	2017-08-04 08:50:45	2017-08-03 12:31:43
25442035	2017-08-03 10:25:20	2017-08-04 08:23:14	2017-08-03 10:57:12
25436767	2017-08-02 16:26:17		2017-08-02 17:44:15
25432291	2017-08-02 13:53:37	2017-08-03 10:59:46	2017-08-03 11:35:47
24614254	2017-08-02 13:38:45	2017-08-03 14:43:44	2017-08-03 14:56:27
25441782	2017-08-02 12:18:50	2017-08-03 13:55:43	2017-08-02 12:49:24
25431900	2017-08-02 11:04:56		2017-08-02 12:48:53
25441614	2017-08-02 10:40:01		2017-08-02 11:34:13
25437959	2017-08-02 10:23:06	2017-08-03 13:43:05	2017-08-02 10:59:09
25458908	2017-08-23 20:05:49		2017-08-23 20:05:49
25437308	2017-07-31 16:19:02	2017-07-31 16:09:09	2017-08-02 09:24:30
25436819	2017-07-31 17:11:27	2017-07-31 16:27:15	2017-08-02 09:10:35
25437623	2017-07-31 15:53:10	2017-07-31 15:34:16	2017-08-02 09:57:27
25437014	2017-07-31 16:44:40	2017-07-31 15:56:52	2017-08-02 08:11:03
25438024	2017-07-31 14:37:57	2017-07-31 13:41:43	2017-08-02 17:31:04
25436189	2017-07-31 14:00:26		2017-07-31 14:50:58
25429216	2017-07-31 13:00:38		2017-07-31 14:41:17
25429183	2017-07-31 12:26:49	2017-07-31 17:54:44	2017-07-31 14:55:06
25425038	2017-07-31 11:16:44	2017-07-31 17:52:04	2017-07-31 14:33:48
25438169	2017-07-28 20:05:06		2017-07-28 20:05:06
25436385	2017-07-28 15:25:36	2017-07-28 15:52:50	2017-07-31 10:39:54
25435419	2017-07-28 15:24:47	2017-07-28 15:30:47	2017-07-31 11:26:05
25436090	2017-07-28 14:32:15	2017-07-31 11:58:02	2017-07-28 14:32:15
25435853	2017-07-28 13:29:16	2017-07-28 13:48:16	2017-07-31 13:39:54
25411697	2017-07-28 13:22:49		2017-07-31 09:00:01
25436379	2017-07-28 11:53:10		2017-07-31 10:08:04
25413201	2017-07-28 10:53:02	2017-07-31 09:10:51	2017-07-28 11:46:34
25417448	2017-07-28 10:40:23	2017-07-31 08:50:34	2017-07-28 10:40:23
25433818	2017-07-27 17:28:01	2017-07-27 17:23:24	2017-07-28 07:08:01
25435773	2017-07-27 16:09:11	2017-07-27 16:08:42	2017-07-28 09:52:30
25434215	2017-07-27 14:56:36	2017-07-27 14:31:26	2017-07-28 10:52:14
25434390	2017-07-27 15:14:01	2017-07-27 15:30:05	2017-07-28 07:45:34
25434714	2017-07-27 17:18:40	2017-07-27 17:12:25	2017-07-31 09:25:43
25426457	2017-07-27 12:11:53		2017-07-28 10:53:28
25421297	2017-07-27 11:23:22		2017-07-27 13:51:14
25416579	2017-07-27 11:21:25	2017-07-28 08:21:52	2017-07-27 11:22:19
25434106	2017-07-26 16:19:47	2017-07-26 15:48:36	2017-07-27 09:55:56
25433444	2017-07-26 15:08:02	2017-07-26 14:49:24	2017-07-27 09:26:40
25431899	2017-07-26 14:00:44	2017-07-26 18:36:11	2017-07-26 14:00:44
25426425	2017-07-26 13:35:54	2017-07-26 13:04:43	2017-07-27 10:09:01
25433789	2017-07-26 13:18:08		2017-07-26 13:28:39
25426563	2017-07-26 11:40:35	2017-07-26 16:21:58	2017-07-26 12:17:09
25433769	2017-07-26 11:38:08	2017-07-26 10:49:18	2017-07-27 08:46:14
25431799	2017-07-26 10:30:12		2017-07-27 11:30:47
25432100	2017-07-25 15:49:59	2017-07-25 15:21:01	2017-07-26 10:21:47
25431397	2017-07-25 15:14:04	2017-07-25 14:28:39	2017-07-26 09:57:40
25431180	2017-07-25 14:22:21	2017-07-25 13:58:04	2017-07-26 15:09:47
25430330	2017-07-25 11:33:03	2017-07-26 08:40:35	2017-07-25 13:34:29
25434042	2017-07-25 11:22:57		2017-07-26 10:35:52
25432144	2017-07-24 17:46:16	2017-07-24 17:15:30	2017-07-25 11:46:38
25431985	2017-07-24 17:09:51	2017-07-24 16:34:19	2017-07-25 11:41:38
25431255	2017-07-24 16:18:30	2017-07-24 15:25:31	2017-07-25 11:39:14
25431361	2017-07-24 14:15:45	2017-07-24 14:19:40	2017-07-25 17:30:38
25427479	2017-07-24 13:29:57	2017-07-25 12:03:19	2017-07-25 11:49:05
25430334	2017-07-24 11:37:15	2017-07-24 11:22:07	2017-07-25 08:34:08
25224082	2017-07-24 11:37:35		2017-07-25 11:40:53
25468952	2017-09-05 20:06:12		2017-09-05 20:06:12
25431279	2017-07-21 16:59:42		2017-07-21 17:53:55
25430442	2017-07-21 16:23:09		2017-07-21 17:07:32
25429466	2017-07-21 13:33:13		2017-07-21 14:08:43
25430716	2017-07-21 13:02:41		2017-07-21 17:54:51
25426249	2017-07-21 11:58:08		2017-07-21 17:55:40
25426220	2017-07-21 10:27:08		2017-07-21 10:27:08
25429191	2017-07-21 09:16:28	2017-07-21 11:20:00	2017-07-21 12:37:40
25430335	2017-07-19 16:51:23		2017-07-20 08:09:32
25430232	2017-07-19 15:28:53		2017-07-19 17:33:09
25428341	2017-07-19 15:08:05		2017-07-19 15:08:05
25429225	2017-07-19 13:56:17		2017-07-19 14:32:34
25429321	2017-07-19 13:02:39		2017-07-19 17:23:03
25424939	2017-07-19 11:30:57		2017-07-19 11:53:27
25426903	2017-07-19 10:34:13		2017-07-19 10:34:13
25428280	2017-07-18 16:29:56		2017-07-18 16:29:56
25427566	2017-07-18 14:13:54		2017-07-18 14:46:49
25426926	2017-07-18 13:42:39		2017-07-18 13:47:10
25421246	2017-07-18 11:36:00		2017-07-18 11:36:59
25458905	2017-08-23 20:05:50		2017-08-23 20:05:50
25434435	2017-07-24 20:04:56		2017-07-24 20:04:56
25427441	2017-07-17 14:46:57		2017-07-17 14:46:57
25414691	2017-07-17 16:59:20		2017-07-17 17:13:45
25423783	2017-07-17 12:48:14		2017-07-17 16:13:07
25346313	2017-07-17 14:00:56		2017-07-17 15:22:49
25426678	2017-07-17 11:25:06		2017-07-17 12:04:10
25419688	2017-07-17 10:28:22		2017-07-17 11:36:06
25425400	2017-07-14 16:56:54		2017-07-17 09:07:37
25401314	2017-07-14 16:17:42	2017-07-14 16:28:01	2017-07-17 13:40:30
25422804	2017-07-14 15:30:30		2017-07-17 07:40:41
25422665	2017-07-14 14:11:52		2017-07-14 15:58:14
25424552	2017-07-14 13:08:37		2017-07-14 16:23:42
25426735	2017-07-14 11:33:02	2017-07-14 13:00:21	2017-07-14 12:19:48
25405687	2017-07-14 11:07:24	2017-07-14 12:53:20	2017-07-14 12:20:13
25692103	2017-12-12 20:09:51		2017-12-12 20:09:51
25424844	2017-07-13 14:14:41		2017-07-13 18:39:01
25405468	2017-07-13 14:39:41	2017-07-13 14:27:14	2017-07-14 10:29:19
25424955	2017-07-13 13:44:04		2017-07-13 16:14:44
25425355	2017-07-13 12:24:06		2017-07-13 18:25:39
25426372	2017-07-13 12:35:40		2017-07-13 17:59:22
25420311	2017-07-13 10:06:02		2017-07-13 17:53:01
25425379	2017-07-13 11:37:40		2017-07-14 09:33:55
25425072	2017-07-13 11:23:42		2017-07-13 13:53:23
25393346	2017-07-13 16:22:40	2017-07-14 12:57:24	2017-07-21 10:49:18
25419637	2017-07-12 14:50:21		2017-07-13 15:00:49
25420865	2017-07-12 14:08:53		2017-07-13 08:14:45
25423017	2017-07-12 13:02:42	2017-07-13 17:40:32	2017-07-13 09:58:03
25412165	2017-07-12 11:32:56		2017-07-13 08:30:14
25424538	2017-07-12 11:12:08		2017-07-13 08:33:12
25412826	2017-07-12 10:48:12	2017-07-13 10:33:12	2017-07-13 08:25:23
25392533	2017-07-14 12:30:09		2017-07-14 12:30:09
25424463	2017-07-11 14:43:01	2017-07-11 14:04:00	2017-07-13 10:29:12
25423860	2017-07-11 14:00:19	2017-07-11 13:29:07	2017-07-14 09:45:48
25422791	2017-07-11 12:54:16	2017-07-11 12:38:49	2017-07-13 10:31:15
25418638	2017-07-11 13:02:46		2017-07-12 08:56:49
25422223	2017-07-11 12:56:12		2017-07-12 08:26:58
25422648	2017-07-11 11:16:22	2017-07-14 08:14:04	2017-07-12 09:26:20
25418269	2017-07-11 11:00:58	2017-07-13 16:25:06	2017-07-12 08:39:04
25422349	2017-07-10 17:43:47	2017-07-11 11:16:32	2017-07-11 11:29:05
25420926	2017-07-10 17:34:35	2017-07-13 08:48:11	2017-07-11 12:55:18
25421198	2017-07-10 16:42:38	2017-07-11 10:52:12	2017-07-11 09:07:07
25420539	2017-07-10 15:46:59	2017-07-10 15:58:39	2017-07-13 10:26:07
25420272	2017-07-10 15:25:34		2017-07-11 09:05:30
25413371	2017-07-10 14:43:57	2017-07-10 14:23:37	2017-07-11 11:29:32
25412778	2017-07-10 14:07:06		2017-07-13 11:09:45
25410645	2017-07-10 12:18:26	2017-07-11 11:00:04	2017-07-11 09:04:52
25409589	2017-07-10 11:46:00		2017-07-11 09:03:53
25347730	2017-07-10 10:42:17		2017-07-11 09:18:12
25422246	2017-07-10 10:27:15		2017-07-11 12:59:47
25436244	2017-07-26 20:04:58		2017-07-26 20:04:58
25421293	2017-07-07 17:20:54	2017-07-07 17:02:17	2017-07-07 20:14:47
25417491	2017-07-07 17:10:58	2017-07-07 17:56:03	2017-07-07 17:13:34
25407066	2017-07-07 15:25:57		2017-07-11 09:16:51
25412916	2017-07-07 15:11:38	2017-07-07 15:16:42	2017-07-07 20:04:21
25404362	2017-07-07 13:26:06	2017-07-07 12:53:02	2017-07-07 20:27:00
25421278	2017-07-07 13:24:02	2017-07-07 18:18:51	2017-07-07 18:11:31
25390835	2017-07-07 11:54:56	2017-07-07 11:18:48	2017-07-07 19:59:13
25421300	2017-07-07 11:27:05	2017-07-07 18:42:56	2017-07-07 18:50:14
25421292	2017-07-07 10:13:44	2017-07-07 10:43:54	2017-07-07 20:08:41
25421591	2017-07-07 10:52:01		2017-07-11 09:08:33
25550227	2017-10-13 20:07:40		2017-10-13 20:07:40
25420550	2017-07-06 18:16:16		2017-07-06 18:16:16
25420590	2017-07-06 16:45:33	2017-07-06 17:02:29	2017-07-07 10:27:17
25421206	2017-07-06 16:40:10		2017-07-06 17:01:19
25419082	2017-07-06 16:38:42	2017-07-06 15:56:33	2017-07-07 10:03:37
25418765	2017-07-06 15:42:28		2017-07-06 16:58:52
25417150	2017-07-06 15:06:43	2017-07-07 08:21:56	2017-07-06 17:00:32
25417352	2017-07-06 12:47:33	2017-07-06 18:08:36	2017-07-06 16:59:35
25417203	2017-07-06 09:56:02	2017-07-07 08:48:09	2017-07-06 16:55:29
25406939	2017-07-05 17:54:39	2017-07-06 14:28:29	2017-07-06 10:07:08
25399363	2017-07-05 16:55:12	2017-07-05 16:56:59	2017-07-06 17:00:25
25419283	2017-07-05 16:32:08	2017-07-05 15:43:51	2017-07-06 11:25:18
25411988	2017-07-05 13:59:34	2017-07-05 13:34:27	2017-07-05 15:36:48
25418218	2017-07-05 14:21:42	2017-07-06 12:53:47	2017-07-06 10:06:45
25411423	2017-07-05 14:10:29	2017-07-06 11:36:54	2017-07-06 10:06:21
25411333	2017-07-05 12:57:40	2017-07-05 12:10:05	2017-07-05 15:34:22
25411041	2017-07-05 11:50:19	2017-07-06 11:43:08	2017-07-06 10:05:59
25412831	2017-07-05 11:24:37		2017-07-06 12:54:32
25406232	2017-07-05 11:50:08	2017-07-05 10:54:18	2017-07-06 10:02:28
25460900	2017-08-25 20:05:57		2017-08-25 20:05:57
25447665	2017-08-09 20:05:22		2017-08-09 20:05:22
25418877	2017-07-04 15:17:44	2017-07-04 14:49:39	2017-07-05 08:50:44
25411738	2017-07-04 14:44:31	2017-07-04 14:12:17	2017-07-05 08:29:10
25419492	2017-07-04 14:05:28	2017-07-04 13:23:43	2017-07-05 09:05:36
25405823	2017-07-04 13:11:52	2017-07-04 12:22:35	2017-07-06 11:14:57
25400675	2017-07-04 11:28:58	2017-07-04 10:49:11	2017-07-05 08:22:42
25458989	2017-08-23 20:05:50		2017-08-23 20:05:50
25455010	2017-08-18 20:05:40		2017-08-18 20:05:40
25412307	2017-07-03 17:42:05		2017-07-04 08:23:19
25411743	2017-07-03 16:33:03		2017-07-04 11:12:11
25410531	2017-07-03 15:18:37	2017-07-03 14:37:40	2017-07-03 16:59:53
25410612	2017-07-03 14:28:30	2017-07-03 14:01:29	2017-07-03 16:56:48
25416953	2017-07-03 15:43:26	2017-07-03 15:37:38	2017-07-05 09:26:33
25406416	2017-07-03 13:50:14	2017-07-03 13:22:30	2017-07-04 10:41:22
25417360	2017-07-03 13:12:24	2017-07-03 12:37:38	2017-07-03 16:54:27
25409587	2017-07-03 11:38:53	2017-07-03 10:57:51	2017-07-03 17:04:01
25483525	2017-09-22 20:06:47		2017-09-22 20:06:47
25411638	2017-07-04 10:05:45	2017-07-04 09:30:55	2017-07-05 08:40:48
25409989	2017-07-03 09:33:09	2017-07-04 08:21:41	2017-07-03 09:33:09
25415014	2017-06-30 16:56:47	2017-07-03 09:20:12	2017-06-30 17:20:02
25327602	2017-06-30 18:00:14		2017-07-04 16:23:51
25415808	2017-06-30 16:10:02		2017-06-30 17:20:29
25416347	2017-06-30 15:04:19		2017-06-30 17:23:39
25409418	2017-07-03 14:00:21		2017-07-03 16:37:16
25327515	2017-06-30 15:45:14	2017-07-04 08:18:09	2017-07-03 15:47:31
25318982	2017-06-30 11:51:38	2017-06-30 11:59:54	2017-06-30 12:13:56
25416119	2017-06-30 11:17:35		2017-07-03 15:47:51
25413381	2017-06-29 17:20:48	2017-06-29 17:25:34	2017-06-30 17:19:44
25413070	2017-06-29 17:36:41	2017-06-29 17:21:47	2017-06-30 10:23:42
25412603	2017-06-29 17:13:24		2017-06-30 10:30:03
25412833	2017-06-29 17:39:32	2017-06-29 17:46:06	2017-06-30 10:21:04
25412281	2017-06-30 11:09:13	2017-07-06 15:20:31	2017-07-06 08:13:45
25408622	2017-06-29 17:08:42		2017-06-30 14:23:17
25322010	2017-07-10 09:36:03		2017-07-11 07:33:46
25395308	2017-07-03 12:05:42	2017-07-05 10:00:43	2017-07-04 16:12:09
25320533	2017-06-29 13:59:40		2017-06-30 12:09:21
25410822	2017-06-28 16:45:17		2017-06-30 12:10:10
25409582	2017-06-28 16:11:18		2017-06-29 10:16:34
25405318	2017-06-28 17:08:42		2017-06-29 12:40:02
25398826	2017-06-28 15:31:42		2017-06-29 17:09:37
25411729	2017-06-28 13:39:53		2017-06-29 11:24:12
25404862	2017-06-28 12:48:39	2017-06-28 16:56:56	2017-06-28 14:26:52
25412193	2017-06-28 12:17:00		2017-06-29 11:29:47
25428274	2017-07-14 20:04:35		2017-07-14 20:04:35
25428273	2017-07-14 20:04:35		2017-07-14 20:04:35
25409783	2017-06-28 18:50:59	2017-07-03 09:59:54	2017-06-30 13:51:04
25409385	2017-06-28 08:42:33		2017-06-28 11:17:43
25408443	2017-06-27 16:56:42	2017-06-27 16:24:59	2017-06-28 10:45:35
25408834	2017-06-27 15:56:26		2017-06-27 19:23:55
25403525	2017-06-29 12:32:06		2017-06-30 14:02:52
25349281	2017-06-27 12:02:01		2017-06-30 14:05:42
25411343	2017-06-27 11:07:39		2017-06-28 11:19:56
25429369	2017-07-17 20:04:38		2017-07-17 20:04:38
25425254	2017-07-11 20:04:34		2017-07-11 20:04:34
25393241	2017-07-04 09:26:19		2017-07-04 12:46:18
25409372	2017-06-27 08:26:01		2017-06-27 11:28:19
25405251	2017-06-26 17:50:45		2017-06-28 09:27:50
25403618	2017-06-26 19:48:40		2017-06-28 11:18:27
25396698	2017-06-26 14:23:20		2017-06-27 18:08:55
25401081	2017-06-26 13:44:45		2017-06-26 14:40:42
25400397	2017-06-26 13:48:11		2017-06-27 18:13:55
25400006	2017-06-26 11:59:23		2017-06-27 18:16:28
25393333	2017-07-04 09:26:41		2017-07-04 12:31:21
25406417	2017-06-23 18:00:13		2017-06-26 10:53:06
25401389	2017-06-23 17:10:35		2017-06-26 10:40:45
25395224	2017-06-23 15:50:00		2017-06-26 10:44:37
25347574	2017-06-23 14:40:05		2017-06-23 14:40:05
25286215	2017-06-23 11:35:50		2017-06-23 11:42:23
25407369	2017-06-23 15:04:45		2017-06-26 11:00:08
25442019	2017-07-31 20:05:06		2017-07-31 20:05:06
25404380	2017-06-22 14:25:09		2017-06-23 13:25:27
25403453	2017-06-23 13:22:32		2017-06-23 13:22:32
25402041	2017-06-22 15:25:10		2017-06-23 11:29:06
25405183	2017-06-22 17:30:23		2017-06-23 13:19:51
25391272	2017-06-22 15:20:42		2017-06-23 11:27:37
25404963	2017-06-22 14:37:24		2017-06-23 11:29:34
25401649	2017-06-22 18:19:51		2017-06-23 13:22:43
25404879	2017-06-22 14:02:52		2017-06-23 13:23:13
25401372	2017-06-22 13:39:14		2017-06-23 11:28:00
25404249	2017-06-23 09:05:19		2017-06-23 13:24:26
25402031	2017-06-22 11:38:52		2017-06-23 11:28:32
25403877	2017-06-21 17:41:48		2017-06-22 15:31:40
25405784	2017-06-21 17:06:08		2017-06-21 17:13:22
25397545	2017-06-21 18:21:23		2017-06-22 15:56:15
25356318	2017-06-21 18:19:34		2017-06-22 12:01:57
25390289	2017-06-21 13:47:10		2017-06-22 12:02:51
25410973	2017-06-26 20:03:49		2017-06-26 20:03:49
25401286	2017-06-20 18:18:13		2017-06-22 15:47:58
25400023	2017-06-21 12:02:23		2017-06-22 15:51:53
25404368	2017-06-20 14:55:11		2017-06-22 15:30:05
25401024	2017-06-20 17:14:34		2017-06-22 15:49:33
25390712	2017-06-20 16:14:31		2017-06-21 09:52:19
25403219	2017-06-20 14:04:36		2017-06-22 15:45:30
25399932	2017-06-20 12:26:10		2017-06-22 11:24:52
25400174	2017-06-19 16:11:21	2017-06-19 16:24:10	2017-06-19 16:39:42
25400035	2017-06-19 17:24:45		2017-06-21 09:14:46
25337661	2017-06-20 09:50:59		2017-06-22 11:20:43
25399631	2017-06-20 07:38:41		2017-06-22 11:16:00
25392633	2017-06-19 15:48:42		2017-06-22 11:13:00
25284052	2017-06-19 16:14:16		2017-06-20 10:11:54
25390137	2017-06-19 14:46:06		2017-06-21 08:09:05
25452374	2017-08-15 20:05:32		2017-08-15 20:05:32
25387105	2017-06-16 17:24:22		2017-06-19 09:00:13
25394281	2017-06-16 18:19:31		2017-06-16 18:22:47
25396195	2017-06-19 09:47:44		2017-06-22 11:04:28
25390756	2017-06-16 18:33:19		2017-06-22 11:12:00
25396754	2017-06-16 14:40:11	2017-06-16 14:28:14	2017-06-20 09:55:49
25399788	2017-06-16 12:53:44		2017-06-19 11:36:28
25342429	2017-06-16 12:09:59		2017-06-19 10:21:24
25557475	2017-10-24 20:08:11		2017-10-24 20:08:11
25557474	2017-10-24 20:08:11		2017-10-24 20:08:11
25399143	2017-06-15 15:59:33		2017-06-19 11:28:35
25394006	2017-06-15 14:55:14		2017-06-16 10:02:09
25394988	2017-06-15 13:55:15		2017-06-19 11:26:09
25393327	2017-06-15 12:06:44		2017-06-16 17:07:15
25388210	2017-06-15 11:36:43		2017-06-19 11:21:57
25405114	2017-06-20 20:03:32		2017-06-20 20:03:32
25400358	2017-06-14 18:03:02		2017-06-16 16:33:39
25398734	2017-06-14 16:46:40		2017-06-15 08:26:45
25388194	2017-06-16 14:13:14		2017-06-16 14:13:14
25398184	2017-06-14 17:17:50		2017-06-19 11:27:07
25397815	2017-06-14 15:41:23	2017-06-19 08:39:42	2017-06-16 16:36:56
25397735	2017-06-14 14:40:12	2017-06-14 13:03:24	2017-06-15 13:54:22
25394195	2017-06-14 12:26:25		2017-06-16 09:56:42
25388174	2017-06-14 11:25:48	2017-06-14 10:48:30	2017-06-15 13:50:25
25396311	2017-06-14 10:04:02		2017-06-16 17:02:12
25469688	2017-09-06 20:06:16		2017-09-06 20:06:16
25403708	2017-06-19 20:03:29		2017-06-19 20:03:29
25401062	2017-06-15 20:03:16		2017-06-15 20:03:16
25398076	2017-06-13 17:45:47		2017-06-14 15:04:09
25396260	2017-06-13 15:58:51		2017-06-14 15:06:29
25396397	2017-06-13 15:20:46	2017-06-19 08:06:45	2017-06-16 16:41:51
25391263	2017-06-13 16:24:04		2017-06-14 15:16:34
25392471	2017-06-13 14:13:39		2017-06-14 15:08:45
25395526	2017-06-13 11:26:39	2017-06-13 11:31:15	2017-06-15 09:18:16
25543736	2017-10-05 20:07:22		2017-10-05 20:07:22
25393127	2017-06-12 17:18:09	2017-06-12 16:51:53	2017-06-12 17:18:09
25318919	2017-06-12 16:40:27		2017-06-12 16:40:27
25395524	2017-06-12 15:45:48	2017-06-12 15:51:21	2017-06-13 09:01:53
25389967	2017-06-12 14:51:44	2017-06-12 15:22:38	2017-06-12 17:21:25
25388951	2017-06-12 14:41:03		2017-06-14 15:15:43
25338142	2017-06-12 15:05:34	2017-06-12 14:39:40	2017-06-14 10:03:13
25349465	2017-06-12 12:20:53		2017-06-14 15:20:08
25396016	2017-06-12 11:14:53		2017-06-14 15:56:56
25396615	2017-06-12 15:51:16		2017-06-13 09:14:32
25406076	2017-06-21 20:03:32		2017-06-21 20:03:32
25452652	2017-08-15 20:05:33		2017-08-15 20:05:33
25345808	2017-06-12 10:55:49	2017-06-12 10:36:29	2017-06-12 16:37:32
25393160	2017-06-09 16:12:22	2017-06-09 16:15:51	2017-06-12 17:14:56
25391174	2017-06-09 15:02:36	2017-06-09 14:32:58	2017-06-12 17:48:39
25391103	2017-06-09 13:58:31	2017-06-09 13:13:42	2017-06-13 08:08:14
25390700	2017-06-09 12:42:36	2017-06-09 12:26:22	2017-06-12 17:55:21
25390738	2017-06-09 11:33:17	2017-06-09 11:17:38	2017-06-12 17:58:07
25390692	2017-06-09 10:15:32	2017-06-09 10:03:16	2017-06-12 16:38:57
25394029	2017-06-08 13:41:57	2017-06-08 12:40:18	2017-06-09 09:40:56
25388746	2017-06-08 14:22:54	2017-06-08 13:52:18	2017-06-09 09:43:54
25390937	2017-06-08 12:26:15	2017-06-08 11:14:06	2017-06-09 09:48:23
25459796	2017-08-24 20:05:52		2017-08-24 20:05:52
25389889	2017-06-08 14:59:11	2017-06-08 15:12:17	2017-06-09 09:34:51
25391403	2017-06-07 17:25:12		2017-06-09 14:23:31
25389076	2017-06-07 16:43:21		2017-06-09 14:21:40
25391367	2017-06-07 15:20:37		2017-06-09 09:31:26
25390234	2017-06-06 16:28:32	2017-06-09 09:49:38	2017-06-08 15:34:32
25389068	2017-06-06 15:01:51	2017-06-06 15:24:56	2017-06-07 09:06:56
25385660	2017-06-06 16:41:18	2017-06-06 16:20:19	2017-06-07 09:07:18
25386399	2017-06-08 14:07:55		2017-06-09 09:21:27
25388402	2017-06-06 15:46:59	2017-06-09 17:08:50	2017-06-09 14:36:56
25354610	2017-06-06 17:02:36	2017-06-06 16:46:51	2017-06-07 09:07:23
25390646	2017-06-07 09:08:48		2017-06-08 15:33:28
25329767	2017-06-06 13:50:19	2017-06-06 13:13:13	2017-06-07 08:03:36
25346422	2017-06-07 15:12:07		2017-06-09 14:25:21
25385231	2017-06-06 15:55:50	2017-06-06 15:20:23	2017-06-07 08:39:32
25332404	2017-06-06 11:29:15	2017-06-06 10:34:16	2017-06-07 09:24:34
25345049	2017-06-06 14:27:28	2017-06-06 14:04:41	2017-06-07 09:43:16
25342444	2017-06-06 14:54:22		2017-06-07 13:06:50
25388495	2017-06-06 11:17:44		2017-06-07 10:23:52
25391066	2017-06-06 10:25:47		2017-06-08 15:31:29
25345866	2017-06-06 11:44:33	2017-06-07 13:27:45	2017-06-07 10:09:38
25388239	2017-06-02 20:43:14		2017-06-02 20:43:14
25355778	2017-06-02 16:45:56	2017-06-02 16:05:58	2017-06-14 09:54:04
25351236	2017-06-02 16:30:56		2017-06-07 09:47:53
25351999	2017-06-02 13:44:23		2017-06-07 13:50:06
25352679	2017-06-02 13:19:52	2017-06-02 13:29:35	2017-06-07 09:20:40
25390703	2017-06-02 13:05:07		2017-06-02 13:05:07
25390225	2017-06-02 15:32:57		2017-06-02 15:35:40
25342482	2017-06-01 16:49:19		2017-06-02 17:34:19
25386778	2017-06-01 16:20:49		2017-06-07 13:46:38
25388440	2017-06-01 15:19:58	2017-06-07 12:47:03	2017-06-02 17:17:25
25388407	2017-06-01 11:24:21		2017-06-02 17:19:50
25451674	2017-08-14 20:05:28		2017-08-14 20:05:28
25338983	2017-06-01 14:00:04	2017-06-01 13:39:41	2017-06-02 09:02:42
25387873	2017-06-01 15:26:02	2017-06-01 15:03:30	2017-06-02 10:31:13
25351262	2017-05-31 16:25:19	2017-06-01 09:03:06	2017-06-02 11:22:01
25339948	2017-05-31 15:53:28	2017-06-06 17:55:29	2017-06-01 09:29:56
25386538	2017-06-01 11:30:10	2017-06-01 10:36:25	2017-06-02 13:12:25
25339303	2017-05-31 14:44:47		2017-06-01 18:06:37
25326148	2017-05-31 13:51:12	2017-05-31 13:45:23	2017-06-02 13:13:10
25349510	2017-06-01 09:22:32		2017-06-01 11:34:10
25354985	2017-05-31 12:56:58	2017-05-31 12:30:28	2017-06-02 13:15:36
25420482	2017-07-05 20:04:14		2017-07-05 20:04:14
25386571	2017-05-30 17:17:44		2017-06-02 10:49:02
25352030	2017-05-30 14:34:46	2017-05-30 14:15:30	2017-05-31 09:40:31
25349222	2017-05-31 14:56:10	2017-05-31 14:09:29	2017-06-02 11:26:44
25339634	2017-05-30 15:37:02		2017-06-01 08:54:27
25385150	2017-05-30 17:05:11		2017-06-01 09:03:46
25344952	2017-05-30 13:56:13	2017-05-30 13:31:07	2017-05-31 09:57:21
25386584	2017-05-30 15:03:49		2017-05-31 12:31:55
25416360	2017-06-29 20:03:57		2017-06-29 20:03:57
25365093	2017-05-30 11:13:57	2017-06-01 09:09:27	2017-05-31 09:52:24
25354701	2017-05-30 12:42:36		2017-05-31 09:58:47
25347051	2017-05-30 10:36:23		2017-05-31 09:45:21
25352871	2017-05-31 14:11:36		2017-06-07 09:13:33
25345944	2017-05-30 08:23:45		2017-05-31 09:44:22
25339410	2017-05-29 16:58:04	2017-05-29 16:34:58	2017-05-31 11:03:02
25345831	2017-05-29 15:12:56	2017-05-29 14:31:44	2017-05-31 10:15:01
25333449	2017-05-29 14:17:39	2017-05-29 13:41:14	2017-05-31 10:13:50
25327256	2017-05-29 13:48:56		2017-05-30 09:15:47
25260995	2017-05-29 11:05:59		2017-05-31 09:39:15
25353268	2017-05-26 17:00:36	2017-05-29 15:05:54	2017-05-26 17:18:04
25345094	2017-05-26 16:03:33		2017-05-26 16:52:16
25348914	2017-05-26 15:48:40	2017-05-26 16:56:32	2017-05-29 11:14:12
25352391	2017-05-26 15:20:40	2017-05-26 14:39:25	2017-05-29 12:12:44
25356760	2017-05-26 13:49:23	2017-05-26 13:29:59	2017-05-29 12:15:04
25348852	2017-05-26 15:06:52		2017-05-26 17:18:23
25333097	2017-05-26 15:07:52		2017-05-29 18:20:25
25307719	2017-05-26 13:26:01		2017-05-26 14:34:07
25347975	2017-05-26 11:10:59		2017-05-30 09:09:51
25316697	2017-05-26 12:39:25		2017-05-26 17:24:31
25323324	2017-05-26 11:34:29	2017-05-26 11:19:58	2017-05-26 11:38:54
25351857	2017-05-26 12:15:02		2017-05-26 15:36:47
25341565	2017-05-26 10:51:54	2017-05-26 10:17:35	2017-05-26 10:51:54
25332643	2017-05-26 16:35:42		2017-05-30 09:07:35
25332598	2017-05-24 18:20:08		2017-05-26 08:55:51
25326842	2017-05-24 14:00:39	2017-05-26 10:30:55	2017-05-26 15:54:09
25345167	2017-05-24 15:59:38	2017-05-24 15:40:19	2017-05-26 16:04:50
25346395	2017-05-24 12:08:48		2017-05-26 09:01:14
25350186	2017-05-24 16:39:04		2017-05-26 12:45:45
25345969	2017-05-24 16:22:14		2017-05-26 10:07:05
25459931	2017-08-24 20:05:53		2017-08-24 20:05:53
25345436	2017-05-24 09:27:20		2017-05-24 14:52:22
25345551	2017-05-23 16:46:21	2017-05-23 16:27:25	2017-05-24 11:28:00
25342228	2017-05-23 16:24:44		2017-05-23 16:24:44
25344875	2017-05-23 15:45:04		2017-05-24 14:49:03
25341212	2017-05-23 14:37:08	2017-05-23 14:12:21	2017-05-24 10:02:32
25340686	2017-05-23 14:14:43		2017-05-23 15:48:14
25260928	2017-05-23 13:47:49	2017-05-23 13:18:42	2017-05-24 10:26:59
25318215	2017-05-23 13:25:01		2017-05-24 11:21:58
25309052	2017-05-23 11:39:28		2017-05-24 14:31:55
25281543	2017-05-23 10:52:14		2017-05-23 15:45:49
25396013	2017-06-09 20:02:56		2017-06-09 20:02:56
25347278	2017-05-22 17:01:21	2017-05-23 10:26:22	2017-05-23 09:03:00
25346341	2017-05-22 16:45:34		2017-05-22 16:45:34
25345762	2017-05-22 14:23:55		2017-05-24 10:02:10
25328195	2017-05-22 09:36:18	2017-05-22 09:57:09	2017-05-22 10:39:29
25323248	2017-05-22 08:08:30	2017-05-22 08:24:47	2017-05-22 08:57:02
25336996	2017-05-19 18:22:18	2017-05-19 17:57:17	2017-05-19 18:29:13
25345005	2017-05-19 14:29:51		2017-05-22 14:24:49
25282407	2017-05-19 13:48:58		2017-05-19 15:30:19
25344718	2017-05-19 12:27:12		2017-05-19 12:49:21
25344764	2017-05-19 12:55:16		2017-05-19 13:46:55
25344908	2017-05-19 12:04:07		2017-05-19 12:16:16
25344738	2017-05-19 12:55:28		2017-05-23 09:48:07
25344746	2017-05-19 11:38:17		2017-05-22 10:11:30
25344928	2017-05-19 10:12:04		2017-05-19 15:23:28
25401541	2017-06-15 20:03:16		2017-06-15 20:03:16
25280779	2017-05-18 10:38:13		2017-05-22 09:55:55
25342435	2017-05-17 18:19:56		2017-05-17 18:19:56
25328879	2017-05-17 16:16:32		2017-05-17 17:39:54
25327287	2017-05-17 17:55:29		2017-05-17 17:55:29
25338464	2017-05-17 15:20:33	2017-05-19 08:46:08	2017-05-18 12:29:52
25338762	2017-05-18 09:39:00	2017-05-19 08:14:54	2017-05-18 12:30:12
25340560	2017-05-17 14:07:42		2017-05-17 15:13:18
25339849	2017-05-17 11:20:57		2017-05-17 17:44:36
25339112	2017-05-17 11:18:05		2017-05-18 12:30:31
25337647	2017-05-16 18:21:53		2017-05-18 08:49:36
25338675	2017-05-16 16:40:40		2017-05-17 09:48:34
25337932	2017-05-16 14:30:00	2017-05-18 18:31:34	2017-05-18 11:39:56
25336548	2017-05-16 13:50:10	2017-05-18 18:26:17	2017-05-18 13:03:33
25336032	2017-05-16 12:28:18		2017-05-18 08:16:14
25412024	2017-06-27 20:03:49		2017-06-27 20:03:49
25337091	2017-05-16 09:38:24		2017-05-18 14:27:40
25336006	2017-05-15 17:00:30		2017-05-16 08:21:59
25333220	2017-05-16 10:04:04		2017-05-18 13:05:54
25288728	2017-05-15 15:39:35	2017-05-15 15:12:09	2017-05-16 15:00:13
25150764	2017-05-16 08:42:30		2017-05-16 14:48:49
25340514	2017-05-15 14:16:28		2017-05-15 18:06:50
25339321	2017-05-15 11:50:54	2017-05-17 08:59:45	2017-05-15 17:59:14
25473137	2017-09-11 20:06:32		2017-09-11 20:06:32
25273729	2017-05-15 08:49:32		2017-05-15 10:23:32
25317937	2017-05-15 09:08:32		2017-05-15 18:04:53
25330221	2017-05-12 16:30:25	2017-05-12 16:00:59	2017-05-17 08:47:04
25326814	2017-05-12 14:22:48	2017-05-15 10:21:36	2017-05-12 14:43:03
25336457	2017-05-12 16:37:55	2017-05-12 16:18:32	2017-05-12 16:44:25
25298395	2017-05-12 11:27:37		2017-05-12 16:32:44
25338091	2017-05-12 11:20:45	2017-05-16 08:19:57	2017-05-15 17:52:36
25338080	2017-05-12 10:52:42	2017-05-12 11:14:56	2017-05-12 12:59:46
25337461	2017-05-12 13:10:21	2017-05-12 13:22:55	2017-05-12 13:40:59
25336037	2017-05-11 17:59:15		2017-05-18 08:21:01
25329620	2017-05-12 17:54:28		2017-05-18 08:12:02
25337046	2017-05-11 15:27:35	2017-05-11 15:49:14	2017-05-12 12:59:17
25326200	2017-05-11 17:30:08	2017-05-18 17:01:26	2017-05-17 09:04:41
25336491	2017-05-11 15:26:26	2017-05-11 15:11:39	2017-05-11 17:09:02
25320373	2017-05-11 15:28:46		2017-05-12 10:52:20
25335917	2017-05-11 16:15:01		2017-05-12 10:23:39
25331538	2017-05-11 15:03:26		2017-05-12 11:07:22
25335836	2017-05-11 14:11:20		2017-05-12 10:21:24
25328105	2017-05-11 11:40:31	2017-05-12 11:17:09	2017-05-12 11:20:56
25334514	2017-05-11 15:04:54	2017-05-11 14:24:47	2017-05-11 17:02:32
25335385	2017-05-11 11:33:52		2017-05-12 10:17:40
25337183	2017-05-11 14:11:30	2017-05-11 13:15:12	2017-05-11 16:52:58
25517210	2017-10-04 20:07:17		2017-10-04 20:07:17
25326415	2017-05-10 17:58:02		2017-05-12 10:15:37
25333184	2017-05-10 17:14:52	2017-05-11 09:11:58	2017-05-11 16:36:25
25332966	2017-05-11 09:22:32		2017-05-12 10:09:33
25332906	2017-05-10 17:49:05		2017-05-12 10:04:27
25337012	2017-05-10 17:16:05		2017-05-12 10:26:24
25331462	2017-05-10 17:15:47	2017-05-11 16:55:31	2017-05-12 09:46:47
25330955	2017-05-10 14:01:44	2017-05-10 13:55:41	2017-05-10 14:44:07
25328377	2017-05-10 15:19:59		2017-05-10 16:53:54
25331537	2017-05-10 14:46:20	2017-05-10 13:49:06	2017-05-11 09:42:55
25335751	2017-05-10 13:16:46		2017-05-10 17:03:47
25335124	2017-05-09 17:35:09	2017-05-10 09:45:02	2017-05-10 10:08:15
25331262	2017-05-09 17:24:08	2017-05-09 16:52:19	2017-05-09 17:24:08
25334361	2017-05-09 15:34:07	2017-05-09 15:35:49	2017-05-09 16:31:54
25335221	2017-05-10 11:33:05	2017-05-11 08:29:21	2017-05-11 08:42:29
25330595	2017-05-09 14:07:28	2017-05-09 14:22:34	2017-05-09 15:03:15
25330315	2017-05-09 11:56:57	2017-05-09 12:02:20	2017-05-09 13:48:54
25333227	2017-05-09 11:08:10	2017-05-09 11:12:31	2017-05-09 11:45:25
25397966	2017-06-12 20:03:06		2017-06-12 20:03:06
25332357	2017-05-09 14:56:42		2017-05-12 10:03:34
25331169	2017-05-08 17:03:57	2017-05-08 17:29:53	2017-05-09 09:07:20
25326240	2017-05-08 18:16:47		2017-05-09 08:37:41
25324373	2017-05-09 10:34:11	2017-05-09 10:06:30	2017-05-09 10:34:11
25323029	2017-05-09 10:10:42		2017-05-09 10:28:13
25291740	2017-05-08 14:29:24		2017-05-09 10:23:03
25252598	2017-05-08 13:51:36		2017-05-09 14:45:21
25325871	2017-05-08 11:14:27		2017-05-10 17:09:24
25332608	2017-05-08 11:51:22		2017-05-09 14:31:11
25312211	2017-05-05 17:04:58	2017-05-08 17:22:03	2017-05-09 09:36:01
25249217	2017-05-05 16:53:35	2017-05-05 16:20:00	2017-05-09 09:27:07
25330518	2017-05-05 16:29:15	2017-05-05 16:09:38	2017-05-05 17:40:45
25326218	2017-05-05 15:08:42	2017-05-05 15:16:33	2017-05-05 15:45:58
25323613	2017-05-05 14:24:09	2017-05-05 14:17:33	2017-05-05 14:49:17
25326721	2017-05-05 16:03:38	2017-05-05 13:47:19	2017-05-05 17:13:52
25331766	2017-05-05 13:31:20		2017-05-05 15:38:48
25332510	2017-05-05 13:20:01		2017-05-05 13:20:01
25331782	2017-05-05 13:00:17	2017-05-05 12:49:46	2017-05-05 13:00:17
25331090	2017-05-05 11:22:21	2017-05-05 12:24:26	2017-05-05 13:00:51
25329511	2017-05-04 15:46:15		2017-05-04 19:07:33
25331335	2017-05-04 17:53:40	2017-05-05 10:05:21	2017-05-04 19:13:18
25326143	2017-05-04 15:25:50		2017-05-04 18:55:26
25323677	2017-05-04 19:56:52		2017-05-09 18:01:11
25328382	2017-05-04 13:48:46		2017-05-04 18:57:56
25323563	2017-05-04 11:33:14		2017-05-04 12:01:06
25452372	2017-08-15 20:05:32		2017-08-15 20:05:32
25452371	2017-08-15 20:05:32		2017-08-15 20:05:32
25407696	2017-06-22 20:03:36		2017-06-22 20:03:36
25324392	2017-05-03 14:08:35		2017-05-04 08:13:34
25324763	2017-05-03 16:39:50		2017-05-03 18:17:51
25322307	2017-05-02 15:17:36	2017-05-02 16:45:43	2017-05-02 17:01:24
25327288	2017-05-02 17:45:31	2017-05-02 16:49:03	2017-05-03 11:21:44
25323346	2017-05-02 15:19:24		2017-05-03 08:54:14
25321626	2017-05-02 13:47:45	2017-05-02 13:55:10	2017-05-02 16:05:24
25268184	2017-05-03 13:27:36		2017-05-03 14:43:35
25320571	2017-05-02 12:27:28	2017-05-02 12:22:38	2017-05-02 16:06:11
25326121	2017-05-02 16:27:26	2017-05-02 15:10:17	2017-05-03 11:26:58
25325342	2017-05-02 14:22:16	2017-05-02 14:29:04	2017-05-02 16:08:06
25320139	2017-05-03 10:13:00		2017-05-04 08:37:28
25324177	2017-05-02 14:43:34	2017-05-02 13:39:33	2017-05-03 11:42:52
25320094	2017-05-02 13:45:40	2017-05-02 13:20:40	2017-05-02 16:17:00
25313944	2017-05-02 12:13:04	2017-05-02 11:40:15	2017-05-02 16:14:51
25327738	2017-05-02 11:21:16	2017-05-02 11:08:10	2017-05-02 16:27:15
25272616	2017-05-02 10:33:31	2017-05-02 10:13:18	2017-05-02 16:22:40
25318042	2017-05-02 11:40:39		2017-05-02 12:28:15
25305508	2017-04-28 15:27:03	2017-04-28 15:30:02	2017-04-28 15:55:01
25325454	2017-04-28 15:12:35	2017-04-28 14:51:09	2017-04-28 15:12:35
25321444	2017-04-28 13:57:48	2017-04-28 13:17:19	2017-04-28 17:17:39
25323657	2017-04-28 13:14:08	2017-04-28 13:39:43	2017-04-28 14:05:45
25325562	2017-04-28 14:21:07	2017-04-28 14:06:45	2017-04-28 17:21:53
25323951	2017-04-28 13:04:26	2017-04-28 13:00:05	2017-04-28 14:25:59
25319918	2017-04-28 12:51:37	2017-04-28 11:48:17	2017-04-28 12:51:37
25325059	2017-04-28 11:04:38	2017-04-28 10:59:30	2017-04-28 11:27:29
25456676	2017-08-21 20:05:47		2017-08-21 20:05:47
25449362	2017-08-10 20:05:23		2017-08-10 20:05:23
25322248	2017-04-27 12:23:26	2017-04-27 13:34:34	2017-04-27 13:57:15
25315560	2017-04-27 11:24:02	2017-04-27 11:25:37	2017-04-27 12:06:34
25321145	2017-04-27 10:21:07	2017-04-27 10:40:42	2017-04-27 10:54:57
25312162	2017-04-26 18:17:45	2017-04-26 18:19:09	2017-04-27 08:50:01
25321893	2017-04-26 17:47:04	2017-04-26 17:38:26	2017-05-04 09:00:39
25314455	2017-04-26 14:35:02	2017-04-26 14:28:29	2017-04-26 15:32:48
25257019	2017-04-26 12:14:33	2017-04-26 12:43:38	2017-04-26 12:56:48
25315084	2017-04-26 11:03:00		2017-04-26 12:57:52
25321651	2017-04-26 10:13:13	2017-04-26 10:23:49	2017-04-26 10:57:03
25323729	2017-04-25 16:39:43	2017-04-25 17:50:33	2017-04-25 18:19:14
25320528	2017-04-25 15:32:45	2017-04-25 15:46:50	2017-04-25 16:11:00
25323627	2017-04-25 18:31:01	2017-04-25 18:31:50	2017-04-25 18:53:16
25320387	2017-04-25 13:51:19		2017-04-25 14:14:07
25319017	2017-04-25 12:22:00		2017-04-25 12:41:23
25315743	2017-04-25 09:43:55		2017-04-25 15:26:59
25321911	2017-04-24 19:28:16		2017-04-24 20:01:52
25318507	2017-04-24 16:59:51	2017-05-05 08:52:17	2017-05-04 13:41:11
25319744	2017-04-24 18:33:07		2017-04-24 18:33:07
25307065	2017-04-24 17:59:20		2017-04-25 11:17:45
25309493	2017-04-24 13:10:04		2017-04-25 11:11:03
24999078	2017-04-25 10:10:15	2017-04-25 10:33:31	2017-04-25 11:11:50
25306585	2017-04-24 12:18:43	2017-04-24 11:18:20	2017-04-25 15:03:48
25138074	2017-04-24 09:56:51		2017-04-25 11:41:12
25316588	2017-04-25 16:05:18		2017-05-03 10:26:13
25309463	2017-04-25 15:31:41	2017-04-26 09:21:51	2017-04-26 09:56:48
25318104	2017-04-25 15:31:18		2017-04-27 17:30:13
25271693	2017-04-25 08:40:14	2017-04-25 08:31:20	2017-04-25 09:10:06
25320257	2017-04-25 14:37:59	2017-05-02 10:03:33	2017-04-25 14:37:59
25319370	2017-04-21 16:23:48		2017-04-21 16:54:02
25309642	2017-04-21 17:08:08	2017-04-21 17:09:40	2017-04-21 17:35:28
25319228	2017-04-21 15:50:31		2017-04-21 16:14:29
25320252	2017-04-21 15:44:13	2017-04-21 15:37:43	2017-04-21 15:44:13
25320310	2017-04-21 14:07:21	2017-04-21 14:20:57	2017-04-21 15:03:58
25314298	2017-04-21 10:26:56	2017-04-21 10:54:35	2017-04-21 11:47:39
25550228	2017-10-13 20:07:40		2017-10-13 20:07:40
25314448	2017-04-20 15:11:29	2017-04-20 15:13:56	2017-04-20 15:51:06
25314259	2017-04-20 13:26:54	2017-04-20 14:15:58	2017-04-20 14:39:16
25309591	2017-04-20 11:13:08	2017-04-20 11:16:24	2017-04-20 12:00:14
25330599	2017-05-03 20:01:47		2017-05-03 20:01:47
25352243	2017-05-23 20:02:26		2017-05-23 20:02:26
25329682	2017-05-02 20:01:44		2017-05-02 20:01:44
25336054	2017-05-09 20:01:58		2017-05-09 20:01:58
25342274	2017-05-16 20:02:15		2017-05-16 20:02:15
25314583	2017-04-18 18:04:37	2017-04-19 08:20:49	2017-04-19 09:20:46
25313377	2017-04-18 16:30:30		2017-04-21 15:23:00
25315019	2017-04-19 11:39:13	2017-04-19 11:53:28	2017-04-19 12:06:34
25316545	2017-04-19 10:23:53	2017-04-19 09:51:39	2017-04-19 10:23:53
25314989	2017-04-19 13:25:21	2017-04-19 13:33:06	2017-04-19 13:52:34
25312202	2017-04-18 13:43:55		2017-04-21 14:44:55
25304313	2017-04-18 16:30:27	2017-04-18 18:20:34	2017-04-18 18:28:11
25312187	2017-04-18 13:11:40	2017-04-18 13:07:29	2017-04-18 13:52:49
25312207	2017-04-19 10:40:31	2017-04-19 10:48:14	2017-04-19 11:16:57
25303684	2017-04-18 15:31:33		2017-04-21 15:59:30
25311993	2017-04-18 13:32:16	2017-04-18 11:42:04	2017-05-04 09:16:12
25303013	2017-04-18 14:45:00	2017-04-18 14:24:24	2017-04-18 15:13:04
25299950	2017-04-18 15:53:09	2017-04-18 15:51:06	2017-04-18 16:24:16
25282459	2017-04-18 13:26:43		2017-04-21 15:46:50
25271511	2017-04-18 11:39:09	2017-04-18 11:42:34	2017-04-18 12:39:58
25271167	2017-04-18 11:16:29		2017-04-18 11:16:29
24683260	2017-04-18 11:00:17		2017-04-21 16:58:30
25328325	2017-04-28 20:01:38		2017-04-28 20:01:38
25315578	2017-04-13 16:29:14	2017-04-13 16:37:00	2017-04-13 18:05:10
25310571	2017-04-13 13:35:37	2017-04-13 13:37:34	2017-04-13 14:05:51
25312018	2017-04-13 14:19:01	2017-04-13 14:19:57	2017-04-13 14:47:52
25309485	2017-04-13 15:14:30	2017-04-13 15:16:41	2017-04-13 15:58:05
25310256	2017-04-13 12:01:57	2017-04-13 12:07:39	2017-04-13 13:19:32
25314357	2017-04-18 08:08:01	2017-04-18 08:23:22	2017-04-18 09:03:40
25271273	2017-04-13 13:55:46		2017-04-21 10:55:46
25303447	2017-04-12 17:38:30	2017-04-12 17:28:49	2017-04-13 14:24:55
25310208	2017-04-13 08:36:36	2017-04-13 08:58:49	2017-04-13 09:34:45
25307048	2017-04-12 17:46:46	2017-04-12 16:11:33	2017-04-13 10:00:24
25304274	2017-04-12 16:34:05	2017-04-12 16:13:17	2017-04-12 16:34:05
25299361	2017-04-12 17:52:44	2017-04-12 17:21:53	2017-04-12 18:16:00
25288173	2017-04-12 17:03:57	2017-04-12 16:51:13	2017-04-12 17:12:07
25313480	2017-04-12 15:01:47	2017-04-12 14:47:27	2017-04-12 15:01:47
25268669	2017-04-12 15:42:12	2017-04-12 15:46:30	2017-04-12 16:01:05
25702113	2017-12-22 20:10:07		2017-12-22 20:10:07
25312180	2017-04-12 11:26:13	2017-04-12 11:12:10	2017-04-12 11:26:13
25309434	2017-04-12 12:07:59	2017-04-12 13:35:01	2017-04-12 13:51:38
25309886	2017-04-12 11:59:58	2017-04-12 11:43:07	2017-04-12 11:59:58
25310230	2017-04-12 13:58:40	2017-04-12 14:26:29	2017-04-12 14:36:16
25310355	2017-04-12 09:38:59	2017-04-12 09:36:38	2017-04-12 10:37:59
25287678	2017-04-12 08:08:01	2017-04-12 08:32:39	2017-04-12 09:21:06
25307898	2017-04-11 16:46:20	2017-04-11 16:22:27	2017-04-11 16:46:20
25289596	2017-04-11 15:40:28	2017-04-11 15:44:36	2017-04-11 16:03:33
25309528	2017-04-11 13:45:21	2017-04-11 13:51:09	2017-04-11 14:17:44
25306222	2017-04-11 14:58:56	2017-04-11 14:59:59	2017-04-11 15:21:34
25318562	2017-04-18 20:01:04		2017-04-18 20:01:04
25309751	2017-04-10 16:53:36		2017-04-10 17:56:09
25309394	2017-04-11 08:55:46	2017-04-11 08:41:47	2017-04-11 08:55:46
25307761	2017-04-11 09:48:31	2017-04-11 09:20:52	2017-04-11 10:20:10
25307273	2017-04-10 15:25:50	2017-04-10 15:45:03	2017-04-10 16:31:48
25305597	2017-04-10 13:59:29	2017-04-10 14:00:55	2017-04-10 14:47:32
25290720	2017-04-10 12:18:21	2017-04-10 12:35:35	2017-04-10 12:52:10
25288295	2017-04-10 11:21:31	2017-04-10 11:30:25	2017-04-10 11:50:34
24999231	2017-04-10 10:58:58	2017-04-10 10:31:01	2017-04-10 15:05:29
25309294	2017-04-07 16:44:43	2017-04-07 16:35:40	2017-04-07 16:44:43
25283967	2017-04-07 15:52:59		2017-04-20 08:57:29
25306179	2017-04-07 15:41:02	2017-04-07 16:09:17	2017-04-07 16:24:34
25308551	2017-04-07 14:10:31	2017-04-07 13:53:38	2017-04-07 14:10:31
25308368	2017-04-07 16:20:32		2017-04-07 17:20:32
25308847	2017-04-07 13:04:00	2017-04-07 13:08:53	2017-04-07 13:34:58
25287706	2017-04-07 14:12:46		2017-04-07 15:11:54
25307449	2017-04-07 13:28:14		2017-04-07 14:15:47
25308829	2017-04-07 12:44:41		2017-04-07 14:40:42
25308772	2017-04-07 10:54:06		2017-04-07 15:40:03
25308783	2017-04-07 10:03:45		2017-04-07 14:24:05
25321475	2017-04-21 20:01:12		2017-04-21 20:01:12
25325349	2017-04-26 20:01:32		2017-04-26 20:01:32
25307197	2017-04-06 14:18:02		2017-04-11 09:26:31
25307196	2017-04-06 14:47:00		2017-04-06 15:49:23
25291400	2017-04-06 14:12:24	2017-04-06 14:05:22	2017-04-06 15:26:04
25306354	2017-04-06 14:13:17		2017-04-06 15:49:47
25283586	2017-04-06 11:16:58		2017-04-06 15:50:13
25392993	2017-06-06 20:02:47		2017-06-06 20:02:47
25324472	2017-04-25 20:01:26		2017-04-25 20:01:26
25298748	2017-04-05 16:22:28		2017-04-06 10:10:32
25289549	2017-04-05 15:34:12	2017-04-06 14:35:22	2017-04-06 10:08:48
25225353	2017-04-05 15:00:25		2017-04-06 08:18:19
25291606	2017-04-05 13:59:56		2017-04-06 10:06:34
25304267	2017-04-05 11:07:55		2017-04-06 10:09:55
25305517	2017-04-04 14:47:13		2017-04-05 08:08:31
25305532	2017-04-04 17:29:50		2017-04-05 17:16:25
25304098	2017-04-04 13:38:34		2017-04-04 16:07:04
25325800	2017-04-26 20:01:33		2017-04-26 20:01:33
25341252	2017-05-15 20:02:13		2017-05-15 20:02:13
25299178	2017-04-03 15:01:24	2017-04-04 09:54:37	2017-04-06 16:39:17
25300112	2017-04-03 14:08:23		2017-04-03 16:17:29
25282453	2017-04-03 14:07:25		2017-04-04 08:43:07
25297530	2017-04-03 14:01:35		2017-04-03 15:14:19
25138083	2017-04-03 13:35:01		2017-04-03 16:41:21
25138158	2017-04-03 11:09:13		2017-04-06 15:47:22
24678640	2017-04-03 11:06:53		2017-04-06 10:03:42
25401909	2017-06-16 20:03:21		2017-06-16 20:03:21
25300464	2017-04-03 15:04:04		2017-04-04 08:46:02
25298744	2017-04-04 10:39:20		2017-04-04 13:21:34
25285116	2017-04-03 11:24:39		2017-04-03 14:47:04
25299881	2017-03-31 13:40:16	2017-03-31 17:19:03	2017-03-31 17:53:10
25124834	2017-03-31 11:45:19	2017-03-31 11:19:59	2017-03-31 16:17:31
25288298	2017-03-31 11:14:04	2017-03-31 11:02:38	2017-04-03 08:18:24
25299482	2017-03-30 17:44:04	2017-03-31 13:48:58	2017-03-31 10:06:46
25299543	2017-03-31 08:09:15	2017-03-31 09:01:49	2017-03-31 17:15:43
25298677	2017-03-30 16:54:00		2017-04-04 10:26:19
25298180	2017-03-31 10:50:47	2017-03-31 10:26:35	2017-03-31 16:04:33
25299000	2017-03-30 14:14:02	2017-03-30 14:01:19	2017-03-30 17:30:12
25299353	2017-03-30 15:05:41	2017-03-30 15:01:59	2017-03-31 09:42:59
25298117	2017-03-31 10:13:03	2017-03-31 09:46:30	2017-03-31 17:07:11
25299507	2017-03-30 14:50:06	2017-03-30 14:26:52	2017-03-30 17:42:57
25298931	2017-03-30 13:55:59		2017-04-04 14:45:25
25297666	2017-03-30 13:22:26	2017-03-30 13:24:47	2017-03-30 17:23:49
25297696	2017-03-30 16:52:29		2017-04-04 14:45:38
25546704	2017-10-10 20:07:37		2017-10-10 20:07:37
25290132	2017-03-30 12:57:00	2017-04-03 08:24:52	2017-03-30 13:44:58
25279048	2017-03-30 11:57:07	2017-03-30 11:44:14	2017-03-31 09:38:12
25291119	2017-03-29 15:51:07	2017-03-29 15:30:50	2017-03-30 09:06:54
25298107	2017-03-30 11:16:29	2017-03-30 11:00:36	2017-03-30 17:08:16
25289633	2017-03-29 16:22:25	2017-03-29 16:04:07	2017-03-30 11:18:01
25288416	2017-03-30 10:59:30	2017-03-30 10:47:06	2017-03-30 16:55:49
25269080	2017-03-29 12:45:06		2017-03-31 17:47:02
25284763	2017-03-29 14:15:46	2017-03-29 15:12:28	2017-03-30 08:30:30
25260548	2017-03-29 14:14:53	2017-03-29 13:56:24	2017-03-30 08:12:15
24486594	2017-03-29 11:46:30	2017-03-29 11:45:10	2017-03-31 09:25:48
25283662	2017-03-29 10:24:54		2017-03-31 17:21:50
25325994	2017-04-27 20:01:36		2017-04-27 20:01:36
25331706	2017-05-04 20:01:51		2017-05-04 20:01:51
25331952	2017-05-04 20:01:51		2017-05-04 20:01:51
25297564	2017-03-29 11:28:01	2017-03-29 10:00:38	2017-03-29 14:55:08
25291429	2017-03-28 15:52:31	2017-03-29 09:21:50	2017-03-30 09:17:22
25290667	2017-03-28 15:42:09	2017-03-28 15:18:48	2017-03-29 09:15:39
25290319	2017-03-28 14:54:22	2017-03-28 14:45:26	2017-03-28 17:51:15
25289251	2017-03-28 14:02:15		2017-03-31 17:08:59
25289047	2017-03-28 14:38:56	2017-03-28 14:18:43	2017-03-28 17:29:54
25289351	2017-03-28 14:12:34	2017-03-28 13:43:33	2017-03-28 17:45:07
25298311	2017-03-28 11:53:39	2017-03-28 13:20:37	2017-03-29 08:56:14
25325920	2017-04-26 20:01:31		2017-04-26 20:01:31
25312229	2017-04-10 20:00:40		2017-04-10 20:00:40
25288213	2017-03-27 17:48:49	2017-03-27 17:40:47	2017-03-28 10:13:44
25278767	2017-03-27 14:57:07	2017-03-28 09:18:19	2017-03-28 09:30:36
25276602	2017-03-27 14:54:54	2017-03-27 14:45:02	2017-03-28 09:14:47
25270131	2017-03-27 14:29:40	2017-03-27 14:13:51	2017-03-27 17:28:19
25276961	2017-03-27 12:29:14	2017-03-27 13:37:33	2017-03-27 17:35:19
25128113	2017-03-27 12:16:56	2017-03-27 11:45:48	2017-03-27 17:19:26
25132194	2017-03-27 11:33:03	2017-03-27 11:14:31	2017-03-27 17:21:48
24732017	2017-03-27 11:09:58	2017-03-27 10:47:35	2017-03-27 16:59:25
25469128	2017-09-05 20:06:12		2017-09-05 20:06:12
25290316	2017-03-24 17:50:03		2017-03-28 09:01:29
25282852	2017-03-27 09:01:57	2017-03-29 11:40:44	2017-03-28 17:48:30
25284454	2017-03-27 08:43:43	2017-03-27 10:14:08	2017-03-27 16:54:06
25287360	2017-03-27 15:10:41		2017-03-30 13:43:04
25287940	2017-03-27 17:39:19		2017-03-31 17:00:48
25288624	2017-03-27 11:35:23		2017-03-28 15:57:47
25280129	2017-03-24 16:00:16	2017-03-24 16:15:26	2017-03-27 10:25:40
25290989	2017-03-24 15:35:22	2017-03-24 15:33:01	2017-03-27 10:11:05
25564264	2017-11-01 20:08:29		2017-11-01 20:08:29
25347282	2017-05-19 20:02:18		2017-05-19 20:02:18
25289525	2017-03-24 08:26:19	2017-03-24 10:38:14	2017-03-24 11:50:04
25288456	2017-03-23 16:44:15		2017-03-23 17:34:12
25288460	2017-03-23 16:14:20	2017-03-23 16:27:36	2017-03-24 15:03:50
25288974	2017-03-23 15:12:23		2017-03-24 09:34:30
25287813	2017-03-23 17:46:06	2017-03-23 17:23:57	2017-03-24 14:51:27
25288785	2017-03-23 15:00:18	2017-03-23 14:37:47	2017-03-27 08:36:45
25265515	2017-03-23 12:12:21	2017-03-23 12:02:08	2017-03-24 16:30:25
25307518	2017-04-05 20:00:33		2017-04-05 20:00:33
25268536	2017-03-23 11:40:57	2017-03-23 11:12:42	2017-03-29 08:45:41
25151254	2017-03-23 10:14:39	2017-03-23 10:46:53	2017-03-24 12:06:27
25286607	2017-03-22 15:45:03	2017-03-22 15:26:54	2017-03-23 05:42:58
25283195	2017-03-22 14:55:53	2017-03-22 15:32:27	2017-03-23 09:27:10
25282963	2017-03-22 13:29:56	2017-03-22 14:42:05	2017-03-23 09:13:06
25042521	2017-03-22 13:29:42	2017-03-22 14:19:40	2017-03-23 08:45:10
25275522	2017-03-22 11:31:20	2017-03-22 12:02:33	2017-03-23 08:53:04
25287307	2017-03-22 11:00:21	2017-03-22 11:00:00	2017-03-23 09:58:55
25279339	2017-03-22 10:22:36	2017-03-22 10:14:53	2017-03-23 09:01:51
25284390	2017-03-21 12:01:21	2017-03-29 10:22:41	2017-03-28 17:38:51
25277146	2017-03-21 14:30:53	2017-03-22 09:50:41	2017-03-22 09:51:44
25282576	2017-03-21 11:16:07	2017-03-29 10:41:26	2017-03-28 17:47:13
25289456	2017-03-22 20:00:07		2017-03-22 20:00:07
25282293	2017-03-20 17:37:18	2017-03-21 08:51:55	2017-03-21 13:14:58
25284214	2017-03-20 17:32:42	2017-03-20 16:48:31	2017-03-21 13:35:31
25284384	2017-03-20 16:21:06		2017-03-21 13:39:16
25228836	2017-03-20 15:34:36	2017-03-21 11:55:35	2017-03-21 12:13:29
25284835	2017-03-20 14:04:38	2017-03-20 13:48:10	2017-03-21 11:50:26
25270356	2017-03-17 17:00:49	2017-03-19 22:44:52	2017-03-19 23:03:07
25225273	2017-03-17 13:27:38	2017-03-17 16:35:26	2017-03-17 16:04:13
25282944	2017-03-17 12:13:48		2017-03-17 12:13:48
25283234	2017-03-17 11:37:15		2017-03-17 13:37:49
25229266	2017-03-17 11:12:03	2017-03-17 11:12:54	2017-03-17 13:44:29
24660695	2017-03-17 10:57:22		2017-03-17 10:57:22
25399077	2017-06-13 20:03:10		2017-06-13 20:03:10
25410960	2017-06-26 20:03:49		2017-06-26 20:03:49
25279340	2017-03-16 13:30:31		2017-03-17 15:04:01
25279739	2017-03-16 15:12:29	2017-03-16 15:03:48	2017-03-16 16:30:38
25279734	2017-03-16 13:26:32		2017-03-17 08:06:18
25278987	2017-03-16 13:34:30	2017-03-16 14:26:10	2017-03-16 16:40:29
25275986	2017-03-16 13:33:19	2017-03-16 14:08:01	2017-03-16 16:32:01
25346232	2017-05-18 20:02:16		2017-05-18 20:02:16
25265819	2017-03-16 10:27:30	2017-03-16 10:28:34	2017-03-16 11:37:28
25282437	2017-03-15 16:19:38		2017-03-16 10:13:32
25278559	2017-03-15 15:50:01	2017-03-15 16:10:40	2017-03-16 10:18:16
25269443	2017-03-15 15:29:24		2017-03-16 10:06:45
25271834	2017-03-15 14:22:51		2017-03-17 08:02:27
25270845	2017-03-15 14:11:47		2017-03-16 10:16:26
25279240	2017-03-15 16:15:31	2017-03-15 15:57:39	2017-03-16 08:45:58
25265701	2017-03-15 16:54:21	2017-03-15 16:20:24	2017-03-16 08:47:52
25228449	2017-03-15 13:24:50	2017-03-15 11:30:07	2017-03-16 10:07:55
25282426	2017-03-15 13:36:53	2017-03-15 13:34:09	2017-03-16 10:10:45
24655725	2017-03-15 10:04:18		2017-03-15 11:14:21
25284401	2017-03-16 20:04:45		2017-03-16 20:04:45
25269558	2017-03-14 17:23:08		2017-03-15 10:58:55
24651200	2017-03-14 13:15:28		2017-03-16 11:40:30
25271132	2017-03-14 13:14:41	2017-03-14 16:49:49	2017-03-15 10:43:32
25269672	2017-03-14 13:15:01		2017-03-15 10:51:46
25262309	2017-03-14 11:32:49	2017-03-14 13:34:52	2017-03-14 14:06:12
25278826	2017-03-14 11:32:11		2017-03-15 10:58:46
25338287	2017-05-11 20:02:03		2017-05-11 20:02:03
25275938	2017-03-13 17:39:47	2017-03-13 17:32:23	2017-03-14 18:05:17
25275166	2017-03-13 17:24:38	2017-03-13 17:09:38	2017-03-15 08:16:16
25273858	2017-03-13 17:06:53		2017-03-13 17:06:53
25274432	2017-03-13 14:48:45	2017-03-13 14:24:17	2017-03-15 08:10:23
25262436	2017-03-13 13:53:48	2017-03-13 13:31:54	2017-03-13 17:04:16
25171531	2017-03-13 14:30:20		2017-03-14 16:20:07
25114476	2017-03-13 15:54:18	2017-03-13 15:15:23	2017-03-15 08:31:31
24999071	2017-03-13 13:10:33	2017-03-13 12:40:24	2017-03-13 17:01:59
24692892	2017-03-13 12:27:42	2017-03-13 11:22:41	2017-03-13 16:59:51
24644009	2017-03-13 10:54:42	2017-03-13 10:35:07	2017-03-13 16:57:13
25275104	2017-03-10 15:23:00	2017-03-10 15:26:26	2017-03-10 15:59:59
25274951	2017-03-10 14:52:42		2017-03-10 15:55:32
25260224	2017-03-10 12:43:59	2017-03-10 14:04:49	2017-03-10 14:19:17
25152342	2017-03-10 12:29:01		2017-03-10 12:50:46
25274842	2017-03-10 11:26:55		2017-03-10 11:54:29
25275088	2017-03-10 11:33:47		2017-03-10 11:33:47
25275075	2017-03-10 10:10:52	2017-03-10 10:15:14	2017-03-10 10:47:42
25274596	2017-03-09 16:40:45		2017-03-10 09:42:52
25272718	2017-03-09 15:34:22		2017-03-09 15:34:22
25273804	2017-03-09 16:24:48		2017-03-09 16:24:48
25267684	2017-03-09 14:59:04		2017-03-09 14:59:04
25389252	2017-05-31 20:02:35		2017-05-31 20:02:35
25309127	2017-04-06 20:00:32		2017-04-06 20:00:32
25227556	2017-03-09 14:32:12		2017-03-09 14:32:12
25257542	2017-03-08 16:54:01		2017-03-14 13:14:17
25272972	2017-03-08 15:15:09	2017-03-09 08:07:56	2017-03-09 16:06:18
25271806	2017-03-08 15:12:22		2017-03-09 16:11:44
25272581	2017-03-08 14:37:29		2017-03-08 15:55:35
25275022	2017-03-08 15:15:01		2017-03-09 12:09:12
25274055	2017-03-08 14:05:46		2017-03-08 14:05:46
24745312	2017-03-08 12:12:21		2017-03-08 12:12:21
25430588	2017-07-19 20:04:41		2017-07-19 20:04:41
25313347	2017-04-10 20:00:39		2017-04-10 20:00:39
25227572	2017-03-08 11:30:19		2017-03-08 11:30:19
25272420	2017-03-07 17:41:54		2017-03-07 17:42:20
25272368	2017-03-07 15:55:18		2017-03-07 15:55:18
25270825	2017-03-07 14:59:07		2017-03-07 14:59:07
25267127	2017-03-07 13:38:04		2017-03-07 14:03:30
25271835	2017-03-07 12:10:12		2017-03-08 15:22:12
25297896	2017-03-27 20:00:17		2017-03-27 20:00:17
25272059	2017-03-07 09:26:48	2017-03-07 08:22:25	2017-03-07 09:26:48
25270054	2017-03-06 15:09:20		2017-03-13 09:58:34
25271151	2017-03-07 10:36:56		2017-03-07 10:36:56
25270149	2017-03-06 15:08:43		2017-03-13 09:58:55
25228439	2017-03-06 12:35:42		2017-03-13 09:59:10
24707072	2017-03-06 11:53:01		2017-03-06 11:53:01
25275374	2017-03-08 20:04:30		2017-03-08 20:04:30
25270285	2017-03-03 16:38:09	2017-03-03 16:52:13	2017-03-03 17:08:25
25270853	2017-03-06 08:09:54		2017-03-07 10:50:53
25269980	2017-03-03 17:28:07		2017-03-03 17:28:07
25152319	2017-03-03 15:05:23	2017-03-03 15:31:07	2017-03-03 16:19:40
24733777	2017-03-03 13:36:46		2017-03-03 13:36:46
25224578	2017-03-03 12:26:37		2017-03-03 12:26:37
25128803	2017-03-03 12:34:19		2017-03-03 16:19:56
25268943	2017-03-03 13:08:41		2017-03-03 14:36:15
25113359	2017-03-03 10:46:21	2017-03-03 10:47:31	2017-03-03 16:21:37
25271464	2017-03-03 10:14:16	2017-03-03 10:06:55	2017-03-03 16:18:42
25331736	2017-05-04 20:01:51		2017-05-04 20:01:51
25305324	2017-04-03 20:00:26		2017-04-03 20:00:26
24721384	2017-03-02 18:28:24		2017-03-03 08:33:12
25269735	2017-03-02 13:43:21	2017-03-02 15:53:43	2017-03-03 09:34:54
25269661	2017-03-02 13:43:51		2017-03-02 13:43:51
25300598	2017-03-29 20:00:19		2017-03-29 20:00:19
25321769	2017-04-21 20:01:11		2017-04-21 20:01:11
25285587	2017-03-17 20:04:48		2017-03-17 20:04:48
25268354	2017-03-01 17:11:30		2017-03-02 11:24:31
25268756	2017-03-01 15:24:15		2017-03-02 12:24:08
25266765	2017-03-01 15:21:36		2017-03-02 08:14:33
25265114	2017-03-01 13:58:22	2017-03-01 13:35:27	2017-03-02 08:31:59
25265403	2017-03-01 14:19:24	2017-03-01 14:01:33	2017-03-02 08:40:21
25262850	2017-03-01 15:06:07	2017-03-01 14:55:30	2017-03-02 08:47:17
24735089	2017-03-02 10:53:10		2017-03-02 10:53:10
25259136	2017-03-01 12:57:32	2017-03-01 12:26:01	2017-03-03 09:36:04
25409558	2017-06-23 20:03:41		2017-06-23 20:03:41
25282996	2017-03-15 20:04:42		2017-03-15 20:04:42
25267054	2017-03-01 12:46:12		2017-03-01 12:46:12
25266901	2017-02-28 17:22:28		2017-03-01 11:59:12
25247892	2017-02-28 17:04:39		2017-02-28 17:04:39
25265303	2017-02-28 15:20:23		2017-02-28 15:46:27
25262416	2017-02-28 13:45:40		2017-02-28 14:35:14
25261983	2017-02-28 12:52:12		2017-02-28 12:52:12
25224591	2017-02-28 11:01:34		2017-02-28 12:27:40
25266033	2017-02-28 09:10:03	2017-02-28 08:54:12	2017-02-28 09:10:03
25265654	2017-02-27 16:40:35	2017-02-28 08:08:58	2017-03-01 10:27:44
25265681	2017-02-27 17:02:14		2017-02-27 17:02:14
25262052	2017-02-28 09:58:51		2017-02-28 10:15:15
25261882	2017-02-27 14:12:28	2017-02-27 13:36:47	2017-02-28 14:10:47
25257779	2017-02-27 16:15:10		2017-02-27 16:15:10
25225255	2017-02-27 14:43:27		2017-02-28 08:45:48
25003684	2017-02-27 12:27:36	2017-02-28 17:24:05	2017-02-27 12:27:36
25264652	2017-02-27 10:05:58		2017-02-28 15:23:23
25263313	2017-02-24 16:54:33		2017-02-28 10:22:31
25263183	2017-02-24 16:11:40		2017-02-24 16:11:40
25258792	2017-02-24 14:36:08		2017-02-27 13:28:09
25263723	2017-02-24 13:20:45	2017-02-24 12:50:40	2017-02-24 13:20:45
25259479	2017-02-24 14:07:48	2017-02-24 13:50:44	2017-02-24 14:07:48
25263729	2017-02-24 14:30:25		2017-02-24 14:32:05
25259307	2017-02-24 13:27:37		2017-02-27 16:58:32
25263727	2017-02-24 12:40:57		2017-02-27 14:20:43
25265348	2017-02-24 10:32:38		2017-02-24 11:24:41
25270259	2017-03-01 20:04:18		2017-03-01 20:04:18
25264140	2017-02-23 17:53:53		2017-02-24 10:25:46
25259749	2017-02-23 16:41:01	2017-02-24 08:05:51	2017-02-24 08:35:16
25265126	2017-02-23 17:26:54		2017-02-23 17:26:54
25262233	2017-02-23 16:49:43		2017-02-23 16:49:43
25263374	2017-02-23 14:48:10		2017-02-27 09:43:45
25259587	2017-02-23 12:23:39		2017-02-24 08:41:09
25259190	2017-02-23 13:40:23	2017-02-24 09:10:46	2017-02-23 13:40:23
25223307	2017-02-23 11:39:41		2017-02-23 12:03:53
25276816	2017-03-09 20:04:30		2017-03-09 20:04:30
25275045	2017-03-07 20:04:29		2017-03-07 20:04:29
25226114	2017-02-22 17:30:38		2017-02-23 09:22:49
25259929	2017-02-22 15:40:15		2017-02-23 09:34:04
25256533	2017-02-22 16:22:56		2017-02-22 16:22:56
25256908	2017-02-22 14:14:13		2017-02-22 14:43:32
25259913	2017-02-22 14:12:09		2017-02-22 14:12:09
25227558	2017-02-22 17:40:58	2017-02-22 16:54:29	2017-02-23 17:16:57
25192317	2017-02-22 12:37:49		2017-02-22 12:37:49
25157159	2017-02-22 11:23:44		2017-02-22 12:17:35
25260977	2017-02-22 11:16:46		2017-02-22 11:16:46
25267768	2017-02-27 20:04:15		2017-02-27 20:04:15
25258022	2017-02-22 10:45:01		2017-02-22 10:45:01
25257644	2017-02-21 17:56:42
25259914	2017-02-21 17:08:36		2017-02-21 17:08:36
25256314	2017-02-21 16:23:24		2017-02-21 16:23:24
25150610	2017-02-21 15:37:18		2017-02-21 15:37:18
25227799	2017-02-21 14:09:41		2017-02-21 14:09:41
25259150	2017-02-21 11:49:02		2017-02-22 14:43:22
25429176	2017-07-17 20:04:38		2017-07-17 20:04:38
25260454	2017-02-20 15:23:45	2017-02-20 15:16:09	2017-02-20 16:47:46
25260270	2017-02-20 15:36:36	2017-02-20 15:25:59	2017-02-20 16:51:51
25159678	2017-02-21 10:31:52	2017-02-22 08:13:16	2017-02-22 16:38:19
25247001	2017-02-20 13:46:36	2017-02-20 13:32:24	2017-02-20 16:52:24
25143960	2017-02-20 14:48:35		2017-02-21 16:47:03
25156797	2017-02-20 14:30:37	2017-02-20 14:09:27	2017-02-20 17:02:55
25228172	2017-02-20 11:27:45	2017-02-20 11:10:47	2017-02-20 17:04:10
24997820	2017-02-20 11:03:51	2017-02-20 10:35:32	2017-02-20 17:11:37
25285586	2017-03-17 20:04:46		2017-03-17 20:04:46
25271276	2017-03-02 20:04:19		2017-03-02 20:04:19
25259109	2017-02-20 10:21:51	2017-02-20 10:10:19	2017-02-20 16:40:17
25258268	2017-02-17 15:21:49	2017-02-17 16:03:14	2017-02-17 15:50:38
25171794	2017-02-17 14:59:59		2017-02-21 16:38:14
25221985	2017-02-17 14:21:03	2017-02-17 15:26:59	2017-02-20 16:25:29
25114869	2017-02-17 15:36:27		2017-02-21 09:48:57
25256434	2017-02-17 13:32:08		2017-02-17 13:32:08
25259473	2017-02-23 16:33:16		2017-02-24 08:47:50
25152107	2017-02-17 11:58:35		2017-02-17 11:58:35
24987525	2017-02-17 12:01:43	2017-02-17 11:35:29	2017-02-22 08:49:15
25152225	2017-02-17 11:16:22		2017-02-17 11:16:22
25269426	2017-02-28 20:04:15		2017-02-28 20:04:15
25257878	2017-02-16 17:12:28	2017-02-16 16:43:13	2017-02-20 10:03:18
25257241	2017-02-17 08:50:15	2017-02-17 08:10:10	2017-02-17 13:59:35
25228428	2017-02-16 16:31:13	2017-02-16 16:16:04	2017-02-17 14:00:45
25227596	2017-02-16 17:39:42	2017-02-17 09:35:10	2017-02-17 09:52:54
25227609	2017-02-16 17:25:06	2017-02-17 08:28:56	2017-02-17 08:45:34
25227615	2017-02-16 12:56:51	2017-02-16 12:36:27	2017-02-17 09:26:14
25172048	2017-02-16 11:46:19	2017-02-16 11:23:23	2017-02-17 10:11:31
25288657	2017-03-22 20:00:07		2017-03-22 20:00:07
25275028	2017-03-07 20:04:28		2017-03-07 20:04:28
25256752	2017-02-15 16:55:11		2017-02-16 09:09:37
25015183	2017-02-15 17:19:22	2017-02-15 17:14:07	2017-02-17 12:08:35
25257069	2017-02-15 16:42:48	2017-02-15 16:02:54	2017-02-17 15:18:36
25252179	2017-02-15 15:33:02	2017-02-15 14:58:18	2017-02-17 12:17:37
24685469	2017-02-15 16:56:42		2017-02-16 09:07:15
25113166	2017-02-15 16:53:01	2017-02-16 08:13:32	2017-02-17 12:32:29
25225894	2017-02-15 14:00:49	2017-02-16 10:16:11	2017-02-17 12:21:32
24651567	2017-02-15 14:03:12		2017-02-16 09:06:53
25256524	2017-02-15 13:38:56	2017-02-15 13:18:29	2017-02-17 15:12:48
25113108	2017-02-15 14:46:42	2017-02-15 14:52:02	2017-02-16 09:04:48
25253604	2017-02-16 12:44:59		2017-02-16 13:43:30
25248507	2017-02-14 15:11:00	2017-02-14 14:54:29	2017-02-15 09:51:22
25223489	2017-02-16 13:42:37		2017-02-17 14:29:09
25228307	2017-02-13 17:51:31		2017-02-14 09:08:49
25228057	2017-02-13 17:32:07		2017-02-13 17:32:07
25158494	2017-02-13 15:02:13		2017-02-13 15:02:13
25171975	2017-02-13 16:09:27	2017-02-13 15:48:00	2017-02-15 09:56:59
25171576	2017-02-13 16:41:41		2017-02-13 16:41:41
24702918	2017-02-13 18:00:28	2017-02-14 08:22:34	2017-02-15 10:14:09
25124419	2017-02-13 14:04:25		2017-02-13 14:42:11
25137030	2017-02-13 12:03:53		2017-02-13 12:03:53
24638176	2017-02-13 11:13:28		2017-02-13 11:13:28
25137380	2017-02-10 17:42:40	2017-02-14 13:25:49	2017-02-10 17:42:40
25171677	2017-02-10 16:54:42	2017-02-13 08:04:02	2017-02-13 16:41:58
25227869	2017-02-10 14:39:36	2017-02-10 14:02:51	2017-02-10 16:30:44
25225217	2017-02-10 14:39:36		2017-02-10 14:44:41
25226526	2017-02-10 13:00:23	2017-02-10 12:48:07	2017-02-10 16:15:34
25224765	2017-02-10 12:04:27		2017-02-10 16:28:15
25000427	2017-02-10 12:59:48		2017-02-10 16:13:39
25224784	2017-02-10 11:23:21		2017-02-10 11:23:21
25224774	2017-02-10 11:45:41		2017-02-10 11:45:41
24735353	2017-02-10 10:54:28	2017-02-13 09:51:31	2017-02-14 08:22:04
25227722	2017-02-10 10:00:27		2017-02-10 10:59:31
25266613	2017-02-24 20:04:12		2017-02-24 20:04:12
25275566	2017-03-08 20:04:30		2017-03-08 20:04:30
25225985	2017-02-09 15:59:22	2017-02-13 09:14:10	2017-02-13 09:35:27
25033837	2017-02-09 15:19:34		2017-02-10 15:36:23
25224674	2017-02-09 12:58:54		2017-02-09 14:02:27
25224752	2017-02-09 11:43:57		2017-02-09 11:43:57
25256231	2017-02-13 20:03:53		2017-02-13 20:03:53
24725695	2017-02-08 17:24:38		2017-02-09 14:22:05
25141516	2017-02-08 17:22:35	2017-02-08 17:20:38	2017-02-09 08:42:35
25171329	2017-02-09 08:23:31		2017-02-09 09:58:15
25170885	2017-02-08 15:23:10		2017-02-08 15:23:10
25145849	2017-02-08 13:52:14		2017-02-08 15:43:37
25224044	2017-02-08 17:08:48		2017-02-08 17:24:20
24692724	2017-02-08 14:42:20	2017-02-08 14:24:51	2017-02-09 10:38:02
25225499	2017-02-08 13:43:38		2017-02-08 13:43:38
25224584	2017-02-08 12:50:55		2017-02-08 12:50:55
25300206	2017-03-29 20:00:18		2017-03-29 20:00:18
25174452	2017-02-07 15:40:41	2017-02-07 15:31:03	2017-02-08 14:14:21
25223205	2017-02-08 10:00:31	2017-02-08 09:42:16	2017-02-09 10:35:46
25114820	2017-02-06 17:45:14	2017-02-07 14:45:08	2017-02-08 13:57:01
25171215	2017-02-06 17:12:45	2017-02-06 16:50:25	2017-02-07 13:44:49
25150579	2017-02-06 15:21:38	2017-02-06 14:49:11	2017-02-07 16:08:26
25125428	2017-02-06 17:44:23	2017-02-08 08:54:26	2017-02-08 14:05:18
25172012	2017-02-06 16:39:54	2017-02-06 16:09:13	2017-02-07 13:58:48
25392484	2017-06-06 20:02:48		2017-06-06 20:02:48
24989819	2017-02-06 14:20:55	2017-02-06 14:16:16	2017-02-07 14:05:59
24687300	2017-02-06 14:06:13	2017-02-06 12:39:25	2017-02-07 12:21:35
25151323	2017-02-03 18:02:17	2017-02-03 17:32:07	2017-02-06 08:03:41
25150797	2017-02-03 16:51:03	2017-02-03 16:14:48	2017-02-07 15:57:45
25150556	2017-02-03 13:25:43	2017-02-03 13:15:58	2017-02-06 12:01:19
24994161	2017-02-03 14:42:55		2017-02-03 16:03:40
25152434	2017-02-03 12:44:34	2017-02-03 12:54:50	2017-02-03 13:23:22
25150891	2017-02-03 15:54:56		2017-02-09 15:05:59
25150723	2017-02-03 11:32:19		2017-02-03 16:04:37
25151085	2017-02-03 13:43:09	2017-02-03 13:39:11	2017-02-03 16:07:03
24644565	2017-02-03 12:37:25	2017-02-03 13:04:56	2017-02-03 16:07:31
25150754	2017-02-03 13:00:16		2017-02-07 15:00:29
25156783	2017-02-03 10:41:30	2017-02-03 10:57:25	2017-02-03 11:34:01
25144358	2017-02-02 15:45:58		2017-02-03 07:59:36
25150877	2017-02-02 13:50:34		2017-02-03 07:58:47
25140515	2017-02-02 13:51:04		2017-02-02 14:26:54
25134375	2017-02-07 08:40:19	2017-02-07 08:26:44	2017-02-09 11:00:35
25138018	2017-02-01 16:47:26	2017-02-02 10:40:27	2017-02-02 15:38:05
25143855	2017-02-01 16:08:14	2017-02-01 15:51:43	2017-02-02 10:37:28
25143366	2017-02-01 15:06:17	2017-02-01 14:45:53	2017-02-01 15:52:21
25137735	2017-02-01 14:25:49	2017-02-01 13:55:35	2017-02-02 09:17:22
25124500	2017-02-01 13:32:28	2017-02-01 13:52:01	2017-02-01 15:28:22
25142597	2017-02-01 12:44:47	2017-02-01 12:16:04	2017-02-02 09:41:06
25150822	2017-02-01 15:13:03		2017-02-01 17:07:41
24631195	2017-02-01 14:30:12		2017-02-01 14:56:23
25310015	2017-04-07 20:00:32		2017-04-07 20:00:32
25171375	2017-02-03 20:03:42		2017-02-03 20:03:42
25143795	2017-02-01 10:17:30	2017-02-01 10:04:25	2017-02-01 10:17:30
25137193	2017-02-01 10:32:49	2017-02-01 10:53:19	2017-02-01 11:03:23
25124998	2017-02-01 10:25:46	2017-02-01 10:08:00	2017-02-02 09:57:14
24998298	2017-02-01 09:50:06	2017-02-01 09:16:06	2017-02-01 09:50:06
25265540	2017-02-23 20:04:09		2017-02-23 20:04:09
25137664	2017-01-30 17:23:25	2017-01-31 09:10:44	2017-01-31 14:24:39
25125029	2017-01-30 17:22:36	2017-01-30 17:04:15	2017-01-31 12:40:20
25137868	2017-01-31 08:21:06	2017-01-31 08:04:44	2017-01-31 10:14:13
25113165	2017-01-30 16:11:46	2017-01-30 16:30:49	2017-01-31 12:34:11
25125390	2017-01-31 08:52:03	2017-01-31 08:40:16	2017-01-31 11:16:29
25129036	2017-01-30 14:00:43	2017-01-30 15:24:49	2017-01-31 14:09:39
25114472	2017-01-30 15:19:35	2017-01-30 15:32:56	2017-01-31 11:10:14
25124778	2017-01-30 15:02:32	2017-01-30 14:43:01	2017-01-31 11:04:49
24997661	2017-01-30 14:06:05	2017-01-30 12:54:55	2017-01-31 14:09:04
25114556	2017-01-30 12:47:14	2017-01-30 12:21:07	2017-01-31 10:26:17
24701689	2017-01-27 16:20:05		2017-01-30 15:11:39
25132150	2017-01-27 17:22:13	2017-01-30 11:07:16	2017-01-30 08:55:29
25125994	2017-01-27 16:48:49	2017-01-30 08:06:01	2017-02-01 08:54:23
25126419	2017-01-27 14:45:36	2017-01-27 14:27:45	2017-01-27 17:01:14
25124330	2017-01-27 15:04:11		2017-01-27 15:04:11
25114800	2017-01-27 15:21:50		2017-01-27 16:56:06
25137999	2017-01-27 14:52:35	2017-01-27 14:59:59	2017-01-27 17:09:52
24723009	2017-01-27 13:34:29	2017-01-27 13:42:50	2017-01-27 17:14:50
24992252	2017-01-27 13:24:43	2017-01-27 12:26:22	2017-01-27 17:16:38
25127199	2017-01-27 12:16:06	2017-01-27 11:55:33	2017-01-27 17:23:16
25132445	2017-01-26 16:38:44	2017-01-26 16:19:51	2017-01-27 17:30:51
25134959	2017-01-26 15:51:02		2017-01-27 15:57:34
25131931	2017-01-26 16:03:02		2017-01-27 15:55:42
25130465	2017-01-26 16:54:02	2017-01-31 16:55:05	2017-02-01 09:09:35
25125060	2017-01-26 14:47:16	2017-01-26 15:33:06	2017-01-27 17:34:01
25127826	2017-01-26 13:44:48	2017-01-26 13:50:12	2017-01-27 17:40:20
25274907	2017-03-07 20:04:28		2017-03-07 20:04:28
25138182	2017-01-27 20:03:32		2017-01-27 20:03:32
25277739	2017-03-10 20:04:33		2017-03-10 20:04:33
25277738	2017-03-10 20:04:32		2017-03-10 20:04:32
24997194	2017-01-26 09:51:35	2017-01-26 09:33:00	2017-01-26 15:04:02
25114775	2017-01-25 17:46:14		2017-01-26 08:29:13
25114919	2017-01-25 16:38:15	2017-01-26 08:17:37	2017-01-26 15:21:47
25113834	2017-01-25 15:31:54	2017-01-25 15:15:00	2017-01-25 17:36:35
25113496	2017-01-25 15:01:52	2017-01-25 14:27:43	2017-01-25 17:32:25
25014821	2017-01-25 14:25:48		2017-01-26 09:01:38
25096094	2017-01-25 12:08:17	2017-01-25 13:46:54	2017-01-25 12:08:17
25125021	2017-01-25 12:29:24	2017-01-25 12:00:59	2017-01-26 09:13:05
24730365	2017-01-25 10:55:25	2017-01-25 10:29:36	2017-01-25 17:23:24
25326041	2017-04-26 20:01:33		2017-04-26 20:01:33
25119322	2017-01-24 14:30:02	2017-01-24 14:25:36	2017-02-01 09:03:03
25124042	2017-01-24 14:19:43	2017-01-24 14:03:38	2017-01-25 08:39:11
25113778	2017-01-24 14:48:18	2017-01-24 14:34:37	2017-01-24 17:28:10
25401063	2017-06-15 20:03:16		2017-06-15 20:03:16
25256193	2017-02-13 20:03:53		2017-02-13 20:03:53
25113309	2017-01-23 15:51:43		2017-01-26 08:59:19
25113530	2017-01-23 16:17:32	2017-01-23 15:54:34	2017-01-25 08:56:35
25112977	2017-01-23 15:24:30	2017-01-23 14:57:10	2017-01-24 17:38:40
25098863	2017-01-23 14:39:17	2017-01-23 14:17:34	2017-01-24 17:42:07
25091258	2017-01-23 16:20:29	2017-01-24 11:47:13	2017-01-24 16:40:42
25004899	2017-01-23 14:07:23	2017-01-23 13:28:19	2017-01-23 14:07:23
24729380	2017-01-23 14:10:02	2017-01-23 13:52:44	2017-01-24 16:28:44
24732464	2017-01-23 12:31:16	2017-01-23 12:20:49	2017-01-24 16:24:27
24999481	2017-01-23 07:25:37	2017-01-23 07:17:08	2017-01-27 15:18:56
24997462	2017-01-21 12:37:43	2017-01-21 12:22:21	2017-01-23 09:55:59
24730479	2017-01-20 16:22:19	2017-01-21 11:48:38	2017-01-24 12:26:23
25093301	2017-01-20 15:26:23	2017-01-20 15:11:14	2017-01-23 10:02:11
25080345	2017-01-20 16:21:56	2017-01-20 16:12:53	2017-01-21 11:29:22
24998297	2017-01-20 16:34:46		2017-01-20 16:34:46
25079156	2017-01-20 15:32:30		2017-01-20 15:32:30
24997827	2017-01-20 12:45:41	2017-01-20 12:40:45	2017-01-23 06:38:20
25005351	2017-01-20 12:28:56	2017-01-20 12:11:59	2017-01-23 06:40:45
24727940	2017-01-20 12:02:52	2017-01-20 11:46:28	2017-01-23 06:46:23
25079406	2017-01-20 11:32:40	2017-01-20 11:07:49	2017-01-23 07:04:46
25015386	2017-01-20 07:34:26	2017-01-20 07:33:46	2017-01-23 06:59:54
25015993	2017-01-20 07:44:30	2017-01-20 09:28:04	2017-01-23 06:52:13
24998549	2017-01-20 07:39:03	2017-01-20 08:43:13	2017-01-23 06:53:20
24688236	2017-01-20 07:42:03	2017-01-20 07:41:43	2017-01-23 06:57:55
25321472	2017-04-21 20:01:11		2017-04-21 20:01:11
25395906	2017-06-09 20:02:56		2017-06-09 20:02:56
25137820	2017-01-26 20:03:32		2017-01-26 20:03:32
24991209	2017-01-23 07:26:14	2017-01-25 09:29:00	2017-01-30 10:44:03
24444752	2017-01-18 17:11:32	2017-01-18 16:51:47	2017-01-19 12:14:41
25016081	2017-01-18 17:16:14	2017-01-19 09:08:37	2017-01-19 12:16:56
24999767	2017-01-18 16:20:32	2017-01-19 11:40:11	2017-01-19 11:47:49
25000660	2017-01-18 17:19:54	2017-01-19 09:28:57	2017-01-20 14:25:14
24999599	2017-01-19 09:02:28		2017-01-19 09:02:28
24995157	2017-01-18 13:55:37	2017-01-19 10:05:22	2017-01-19 12:20:37
24989891	2017-01-18 12:08:28	2017-01-18 11:43:12	2017-01-19 09:04:54
24690203	2017-01-19 09:52:02		2017-01-20 14:23:46
24666909	2017-01-18 11:27:50	2017-01-18 10:53:05	2017-01-19 08:58:36
25015539	2017-01-18 10:27:09	2017-01-18 10:00:16	2017-01-18 16:23:39
25003415	2017-01-18 09:53:22	2017-01-18 09:15:19	2017-01-18 16:14:45
25002553	2017-01-17 15:07:28	2017-01-17 14:53:10	2017-01-18 15:36:01
25000666	2017-01-17 15:57:59	2017-01-17 15:41:59	2017-01-18 16:03:32
25001788	2017-01-17 14:21:50	2017-01-17 14:02:28	2017-01-18 15:41:24
25266597	2017-02-24 20:04:10		2017-02-24 20:04:10
25172886	2017-02-03 20:03:41		2017-02-03 20:03:41
25329996	2017-05-02 20:01:43		2017-05-02 20:01:43
25000684	2017-01-16 17:27:31	2017-01-16 17:10:07	2017-01-19 14:01:57
25000231	2017-01-16 17:02:08	2017-01-16 16:38:05	2017-01-19 13:53:18
25000813	2017-01-16 14:13:28	2017-01-16 14:06:43	2017-01-17 10:09:07
24997293	2017-01-16 15:29:11		2017-01-17 08:29:26
24997379	2017-01-16 18:08:31		2017-01-17 08:34:18
24989912	2017-01-16 13:41:50	2017-01-16 12:53:26	2017-01-17 09:28:52
24795010	2017-01-16 15:16:24	2017-01-16 14:45:49	2017-01-17 10:20:55
24719375	2017-01-16 12:44:55	2017-01-16 11:31:58	2017-01-17 09:26:31
24989831	2017-01-16 10:50:05	2017-01-16 10:23:36	2017-01-17 09:34:11
24990782	2017-01-17 14:53:25		2017-01-18 15:02:09
24819251	2017-01-18 13:00:36		2017-01-19 16:16:42
24794461	2017-01-13 15:29:11		2017-01-17 08:23:05
24998327	2017-01-13 14:13:28		2017-01-20 08:11:49
24998322	2017-01-13 12:55:26		2017-01-20 08:17:43
24998274	2017-01-13 13:06:40		2017-01-13 15:59:32
24729848	2017-01-17 14:53:57		2017-01-18 13:53:22
24998285	2017-01-13 11:24:44		2017-01-13 15:59:39
25000147	2017-01-13 14:06:44		2017-01-13 15:14:49
24998534	2017-01-12 14:27:39		2017-01-12 14:27:39
24998103	2017-01-12 13:49:46	2017-01-13 08:22:55	2017-01-13 11:38:25
24998125	2017-01-12 13:22:00	2017-01-12 13:13:04	2017-01-13 16:01:48
24998706	2017-01-12 13:23:50		2017-01-12 13:23:50
24997129	2017-01-12 15:37:02	2017-01-17 11:03:25	2017-01-13 16:51:26
24997384	2017-01-12 12:22:56	2017-01-12 16:59:42	2017-01-12 12:22:56
24997970	2017-01-12 11:31:18		2017-01-12 11:31:18
24990865	2017-01-11 16:49:03	2017-01-12 08:53:53	2017-01-12 09:58:33
24616936	2017-01-11 17:21:24		2017-01-12 09:57:06
24995640	2017-01-11 15:09:25	2017-01-11 14:28:01	2017-01-12 09:29:22
24991876	2017-01-11 18:30:29	2017-01-17 10:48:53	2017-01-12 15:24:51
24720802	2017-01-11 16:23:20		2017-01-11 16:23:20
24987355	2017-01-11 17:40:02		2017-01-11 17:40:02
24726672	2017-01-11 14:35:06		2017-01-11 14:35:06
24724455	2017-01-11 13:10:15	2017-01-11 12:49:02	2017-01-12 11:09:35
24708776	2017-01-11 14:10:21		2017-01-12 10:42:56
24997381	2017-01-11 13:13:57		2017-01-11 13:13:57
24997968	2017-01-11 11:13:08		2017-01-11 11:13:08
25260516	2017-02-17 20:04:00		2017-02-17 20:04:00
25258561	2017-02-15 20:03:57		2017-02-15 20:03:57
24995356	2017-01-10 17:41:35	2017-01-11 08:21:29	2017-01-12 09:18:10
24993973	2017-01-10 15:46:19		2017-01-11 09:41:10
24991807	2017-01-10 14:42:24		2017-01-10 14:42:24
24995442	2017-01-10 15:10:16		2017-01-10 15:10:16
24992141	2017-01-10 13:05:47		2017-01-10 13:05:47
24994939	2017-01-10 12:44:34		2017-01-10 12:46:49
24994263	2017-01-10 10:57:23		2017-01-10 10:57:23
25143321	2017-01-30 20:03:37		2017-01-30 20:03:37
25225916	2017-02-08 20:03:46		2017-02-08 20:03:46
24991649	2017-01-10 09:31:45		2017-01-10 09:31:45
24710100	2017-01-09 16:52:12	2017-01-09 16:12:24	2017-01-10 11:34:49
24994193	2017-01-10 09:59:10		2017-01-10 09:59:10
24990960	2017-01-09 17:13:44	2017-01-10 14:26:22	2017-01-10 08:39:08
24987947	2017-01-09 17:48:04		2017-01-09 17:48:04
24987277	2017-01-09 16:23:10		2017-01-09 16:23:10
24705517	2017-01-09 15:38:26	2017-01-10 10:16:27	2017-01-09 15:39:29
25412649	2017-06-28 20:03:53		2017-06-28 20:03:53
25300558	2017-03-29 20:00:19		2017-03-29 20:00:19
25300557	2017-03-29 20:00:18		2017-03-29 20:00:18
25157590	2017-02-02 20:03:39		2017-02-02 20:03:39
24809153	2017-01-12 16:16:11	2017-01-13 10:48:19	2017-01-13 11:23:18
24617814	2017-01-06 17:04:45	2017-01-09 14:15:50	2017-01-10 09:18:01
24729359	2017-01-06 16:35:36	2017-01-06 16:02:29	2017-01-09 12:11:59
24989841	2017-01-06 15:50:30	2017-01-06 15:03:47	2017-01-09 07:21:33
24991344	2017-01-06 14:59:39	2017-01-06 14:22:58	2017-01-09 15:23:33
24991570	2017-01-06 13:33:07	2017-01-06 13:53:51	2017-01-06 14:11:55
24992231	2017-01-06 15:45:31	2017-01-06 14:34:49	2017-01-06 15:55:09
24992514	2017-01-06 11:54:28	2017-01-06 16:07:46	2017-01-06 14:39:02
24991333	2017-01-06 10:59:23	2017-01-06 10:46:39	2017-01-09 07:08:11
24992184	2017-01-06 10:43:11	2017-01-06 10:13:58	2017-01-09 07:04:20
25396014	2017-06-09 20:02:57		2017-06-09 20:02:57
25132508	2017-01-25 20:03:29		2017-01-25 20:03:29
24990701	2017-01-05 16:41:48	2017-01-09 10:45:25	2017-01-09 16:54:11
24725759	2017-01-05 15:41:55		2017-01-05 16:11:46
24746411	2017-01-05 15:08:04		2017-01-05 16:49:27
24728920	2017-01-05 14:45:48		2017-01-05 16:11:23
24989998	2017-01-05 12:28:14		2017-01-05 15:04:05
24730440	2017-01-05 12:24:29		2017-01-05 17:09:49
25559648	2017-10-26 20:08:15		2017-10-26 20:08:15
24697381	2017-01-04 17:21:07	2017-01-04 17:24:57	2017-01-05 09:46:44
24724752	2017-01-04 16:27:15	2017-01-04 16:57:27	2017-01-05 09:50:44
24989906	2017-01-04 16:30:06		2017-01-04 18:18:58
24918759	2017-01-04 15:36:40	2017-01-04 15:15:35	2017-01-05 10:00:41
24731995	2017-01-04 16:39:39	2017-01-04 15:57:14	2017-01-09 09:21:56
[truncated: 12,240 more rows]
